1 **Title:** Dynamic cortico-cortical information transfer regimes during vocalization.

2

3 **Authors:** Francisco García-Rosales<sup>1\*</sup>, Luciana López-Jury<sup>1</sup>, Eugenia Gonzalez-Palomares<sup>1</sup>,  
4 Johannes Wetekam<sup>1</sup>, Yuranny Cabral-Calderín<sup>2</sup>, Ava Kiai<sup>1</sup>, Manfred Kössl<sup>1</sup>, Julio C.  
5 Hechavarría<sup>1\*</sup>.

6 **Affiliations:** <sup>1</sup> Institut für Zellbiologie und Neurowissenschaft, Goethe-Universität, 60438  
7 Frankfurt/M., Germany. <sup>2</sup> Research Group Neural and Environmental Rhythms, Max Planck  
8 Institute for Empirical Aesthetics, 60322 Frankfurt/M., Germany.

9 \* *Corresponding authors.*

10

11 **Mailing address:**

12 \* Francisco García-Rosales, Institut für Zellbiologie und Neurowissenschaft, Max-von-Laue-  
13 Str. 13, 60438 Frankfurt/Main, Germany, Tel.: (+49) 69 / 798 42063. Email:

14 [garciarosales@bio.uni-frankfurt.de](mailto:garciarosales@bio.uni-frankfurt.de)

15 \* Julio C. Hechavarría, Institut für Zellbiologie und Neurowissenschaft, Max-von-Laue-Str.  
16 13, 60438 Frankfurt/Main, Germany, Tel.: (+49) 69 / 798 42062. Email:

17 [hechavarría@bio.uni-frankfurt.de](mailto:hechavarría@bio.uni-frankfurt.de)

18

19 **Abstract**

20 The mammalian frontal and auditory cortices are fundamental structures supporting vocal  
21 production, yet the dynamics of information exchange between these regions during  
22 vocalization are unknown. Here, we tackle this issue by means of electrophysiological  
23 recordings in the fronto-auditory network of freely-vocalizing *Carollia perspicillata* bats. We  
24 find that oscillations in frontal and auditory cortices provide correlates of vocal production  
25 with complementary patterns across structures. Causality analyses of oscillatory activity  
26 revealed directed information exchange in the network, predominantly of top-down nature  
27 (frontal to auditory). Such directed connectivity was dynamic, as it depended on the type of  
28 vocalization produced, and on the timing relative to vocal onset. Remarkably, we observed  
29 the emergence of bottom-up information transfer only when bats produced calls with evident  
30 post-vocal consequences (echolocation pulses). Our results link vocal production to dynamic  
31 information transfer between sensory (auditory) and association areas in a highly vocal  
32 mammalian animal model.

## 33 **Introduction**

34 Vocal production is a crucial behaviour that underlies the evolutionary success of various  
35 animal species. Several cortical and subcortical structures in the mammalian brain support  
36 vocalization (Jurgens, 2009), their activities related to vocal control (Gavrilov et al., 2017;  
37 Okobi et al., 2019; Zhang and Ghazanfar, 2020), motor preparation (Okobi et al., 2019;  
38 Schulz et al., 2005; Tschida et al., 2019), and feedback correction of vocal outputs (Eliades  
39 and Tsunada, 2018; Eliades and Wang, 2008). However, the precise neural dynamics that  
40 underpin vocal production within these regions, and the nature of long-distance interactions in  
41 large-scale neural networks related to vocal utterance, remain poorly understood.

42 The connectivity patterns of the frontal cortex make it a major hub for cognitive control and  
43 behavioural coordination (Choi et al., 2018; Helfrich and Knight, 2019; Zhang et al., 2016).  
44 Frontal cortical areas are anatomically connected with structures directly involved in vocal  
45 production, such as the periaqueductal grey (Petkov and Jarvis, 2012) and the dorsal striatum  
46 (Voorn et al., 2004). Experimental evidence demonstrates that the neural activity in frontal  
47 regions relates to vocalization (Gavrilov et al., 2017; Hage and Nieder, 2013; Roy et al., 2016;  
48 Weineck et al., 2020), correlating with the acoustic and behavioural properties of produced  
49 calls (Hage and Nieder, 2013; Weineck et al., 2020). Frontal regions are also anatomically  
50 and functionally connected with the auditory cortex (AC; (García-Rosales et al., 2020; Kobler  
51 et al., 1987; Park et al., 2015; Plakke and Romanski, 2014; Winkowski et al., 2013;  
52 Winkowski et al., 2018)), a cornerstone structure for audition that exhibits suppression to self-  
53 produced sounds (Aliu et al., 2009; Baess et al., 2011; Martikainen et al., 2005; Rummell et  
54 al., 2016), including vocalizations (Eliades and Wang, 2003, 2005; Flinker et al., 2010;  
55 Tsunada and Eliades, 2020). Such auditory cortical suppression is thought to be mediated by  
56 preparatory motor signals originating in the motor system (i.e. “corollary discharges” or  
57 “efference copies”; (Clayton et al., 2020; Li et al., 2020)). The attenuation of neural responses  
58 in AC during vocal production supports precise vocal control by means of feedback  
59 mechanisms (Eliades and Tsunada, 2018; Eliades and Wang, 2008), in which frontal cortical  
60 areas are also involved (Behroozmand et al., 2015; Kingyon et al., 2015; Loh et al., 2020;  
61 Toyomura et al., 2007). Although current evidence shows that a fronto-auditory cortical  
62 circuit is essential for the accurate control of vocal production, the interactions between  
63 frontal and auditory cortices during vocalization remain obscure.

64 In this study, we addressed the neural mechanisms of vocal production in the fronto-auditory  
65 network using a highly vocal mammalian model: the bat *Carollia perspicillata* (Fernandez et  
66 al., 2014; Hechavarría et al., 2016; Knornschild et al., 2013, 2014). Bats constitute an  
67 excellent system to study the underpinnings of vocalization because they rely heavily on vocal  
68 behaviour for both communication and navigation. Communication and echolocation calls  
69 differ markedly in their spectrotemporal structure (Knornschild et al., 2014) and are vocalized  
70 for very different behavioural purposes. The production of these calls is distinctly controlled  
71 at the level of the brainstem (Fenzl and Schuller, 2007), possibly mediated by frontal cortical  
72 circuits involving regions such as the anterior cingulate cortex (Gooler and O'Neill, 1987) and  
73 the frontal-auditory field (FAF; (Weineck et al., 2020)).

74 Vocal production circuits were studied by measuring local-field potential (LFP) oscillations  
75 simultaneously in frontal and auditory cortex regions of vocalizing bats. LFPs are an  
76 electrophysiological marker of the extracellular spiking activity and synaptic currents in local  
77 neuronal populations (Buzsáki et al., 2012). In frontal and sensory cortices, these signals  
78 participate in cognitive processes, sensory computations, and interareal communication via  
79 phase coherence (Fries, 2015; García-Rosales et al., 2018; García-Rosales et al., 2020;  
80 Helfrich and Knight, 2016; Lakatos et al., 2008; Lakatos et al., 2013). In the FAF, a richly  
81 connected auditory region of the bat frontal cortex (Eiermann and Esser, 2000; Kobler et al.,  
82 1987), LFP activity predicts vocal output while synchronizing differentially with dorso-  
83 striatal oscillations according to vocalization type (Weineck et al., 2020). Neural oscillation in  
84 the bat FAF also synchronize across socially interacting bats (Zhang and Yartsev, 2019). In  
85 the AC, the roles of oscillatory activity for vocal production are less clear, although human  
86 studies suggest that oscillations mediate communication with frontal and motor areas for  
87 feedback control (Franken et al., 2018; Kingyon et al., 2015; Schmitt et al., 2020). However,  
88 the precise dynamics of information exchange in the fronto-auditory circuit during  
89 vocalization are unknown.

90 We hypothesized the existence of directed information transfer in the FAF-AC network in  
91 accordance with both top-down (frontal to auditory) and bottom-up (auditory to frontal)  
92 mechanisms for vocal production. The former would be consistent with the roles of frontal  
93 regions for vocal coordination; the latter, consistent with the requirements of effective  
94 feedback control. By means of simultaneous electrophysiological recordings in the FAF-AC  
95 circuit of freely vocalizing bats, we were able to confirm this hypothesis. We report complex  
96 causal interactions (within a transfer entropy framework) between frontal and auditory

97 cortices, both during spontaneous activity and periods of vocal production. These interactions  
98 were strongly top-down directed. Connectivity patterns were not static, as they varied  
99 according to whether animals vocalized echolocation or communication calls and depended  
100 on the timing relative to vocal onset. Remarkably, only the production of echolocation pulses  
101 resulted in strong and preferential bottom-up information transfer in the auditory-frontal  
102 direction after vocalization. Our results suggest that dynamic information transfer in large-  
103 scale networks involved in vocal production, such as the FAF-AC circuit, are shaped by the  
104 behavioural consequences of produced calls.

## 105 **Results**

106 Neural activity was studied in the FAF and the AC of *C. perspicillata* bats (3 males) while  
107 animals produced self-initiated vocalizations. From a total of 12494 detected vocalizations,  
108 147 echolocation (“sonar”) and 725 non-specific communication (“non-sonar”) calls were  
109 preceded by a period of silence lasting at least 500 ms and were therefore considered for  
110 subsequent analyses. Representative sonar and non-sonar vocalizations are shown in **Fig. 1a**.  
111 Overall, the two types of vocalizations did not differ significantly in terms of call length  
112 (Wilcoxon rank sum test,  $p = 0.12$ ; **Fig. 1b**), although call length distributions differed  
113 significantly (2-sample Kolmogorov-Smirnov test,  $p = 1.48 \times 10^{-6}$ ). There were clear  
114 differences in the power spectra of sonar and non-sonar calls (**Fig. 1c**, left), such that peak  
115 frequencies of sonar utterances were significantly higher than their non-sonar counterparts ( $p$   
116  $= 4.48 \times 10^{-69}$ ; **Fig. 1c**, right). These spectral differences arise from the stereotypical design of  
117 echolocation and communication calls produced by *C. perspicillata* (Hechavarría et al., 2016;  
118 Knörnschild et al., 2014).

### 119 Oscillations in frontal and auditory cortices predict vocalization type

120 **Figure 1d** illustrates electrophysiological activity recorded simultaneously from FAF and AC  
121 at various cortical depths, as the sonar and non-sonar vocalizations shown in **Fig. 1a** were  
122 produced. Single-trial LFP traces revealed conspicuous pre-vocal oscillatory activity in low  
123 and high-frequencies, more pronounced in frontal regions, and strongest when animals  
124 produced sonar calls. Power spectral densities (PSD) obtained from pre-vocal LFP segments  
125 (i.e. -500 to 0 ms relative to vocal onset; **Fig. 1f**) indicated low- and high-frequency power  
126 increase (relative to a no-vocalization baseline, or “no-voc”) associated with vocal production,  
127 particularly in FAF and for electrodes located at depths  $> 100 \mu\text{m}$  (**Fig. 1e** depicts this at  
128 depths of  $300 \mu\text{m}$ ; see black arrows). Differences in AC conditional on the type of vocal

129 output were less pronounced and appeared limited to low LFP frequencies (grey arrows in  
130 **Fig. 1e**). Such pre-vocal spectral patterns were analysed using canonical LFP frequency  
131 bands, namely: delta ( $\delta$ ), 1-4 Hz; theta ( $\theta$ ), 4-8 Hz; alpha ( $\alpha$ ), 8-12 Hz; low beta ( $\beta_1$ ), 12-20  
132 Hz; high beta ( $\beta_2$ ), 20-30 Hz; and three sub-bands of gamma ( $\gamma$ ):  $\gamma_1$  (30-60 Hz),  $\gamma_2$  (60-120  
133 Hz), and  $\gamma_3$  (120-200 Hz). Pre-vocal LFP power in each band was calculated on a trial-by-trial  
134 basis and normalized to no-voc periods.

135 There were significant power changes between no-voc and pre-vocal periods across frequency  
136 bands (**Fig. 1f**, see also **Fig. S1**). Notably, the power increase in low- ( $\delta$ - $\alpha$ ) and high-  
137 frequency ( $\gamma_2$ ) LFP bands of the FAF was different when animals produced sonar and non-  
138 sonar vocalizations, with the highest increase in the pre-vocal sonar case. The opposite pattern  
139 was observed in the AC, where differences between ensuing vocalization types were most  
140 prominent in  $\beta_1$  (but not  $\delta$ - $\alpha$  or  $\gamma$ ) frequencies, and were explained by higher pre-vocal power  
141 increase for non-sonar than for sonar vocalizations (**Fig. 1f**). Based on these observations, we  
142 addressed whether pre-vocal LFP power in frontal and auditory cortices was a significant  
143 predictor of ensuing call type. To this effect, generalized linear models (GLMs) were fit using  
144 sonar and non-sonar pre-vocal power changes as predictors (see Methods), for all channels (in  
145 both structures) and frequency bands. A summary of these models is given in **Fig. 1g** (see the  
146 outcomes of two representative GLMs illustrated in **Fig. S1**). Low- and high-frequency power  
147 increase (mostly in the  $\delta$ - $\alpha$  and  $\gamma_2$  bands) in FAF predicted whether animals produced sonar or  
148 non-sonar calls, typically with moderate effect sizes ( $p < 0.05$ ;  $R^2_m \geq 0.1$ ), highest in  
149 middle-to-deep electrodes (i.e. depths  $> 300 \mu\text{m}$ ; **Fig 1g**, left). In the AC, pre-vocal power  
150 predicted ensuing call type mostly in the  $\alpha$ - $\beta$  bands of the spectrum, although more strongly  
151 so in  $\beta_1$  frequencies. Moderate effect sizes were also observed ( $p < 0.05$ ;  $R^2_m \geq 0.1$ ), which  
152 were highest in middle-to-deep electrodes (depths  $> 350 \mu\text{m}$ ). In summary, these results  
153 indicate that pre-vocal oscillatory power significantly predicts ensuing call type in both  
154 association (frontal) and sensory (auditory) cortices, though with complementary frequency  
155 specificity and opposite effects.

#### 156 Different morphology of neural oscillations in frontal and auditory cortices

157 We sought to determine whether the functional differences between frontal and auditory  
158 cortical LFPs were echoed by differences in the neural circuitry generating oscillations within  
159 each region. The waveform shape of an oscillatory process is a consequence of its underlying  
160 neural mechanisms (Cole and Voytek, 2017), and therefore shape differences across LFPs are

161 a proxy of mechanistic differences in their generators. We performed cycle-by-cycle analysis  
162 of oscillatory morphology for the LFP activity recorded in FAF and AC (Cole and Voytek,  
163 2019). In the following, we focused on frequency bands that significantly predicted vocal  
164 output across structures:  $\delta$ ,  $\theta$ ,  $\alpha$ ,  $\beta_1$ , and  $\gamma_2$  (see **Fig. 1g** and **Fig. S1**). For robustness, analyses  
165 were performed on whole recordings and not only for LFP segments surrounding  
166 vocalizations. Cycles were detected over the raw LFP signal, and only those found in  
167 oscillatory bursts were considered (**Fig. 2a** shows examples of detected bursts in  $\delta$  and  $\gamma_2$   
168 frequencies). Visual inspection revealed that, for example, average  $\delta$ - and  $\gamma_2$ - bursts differed  
169 between FAF and AC, suggesting not only differences in cycle morphology, but also more  
170 “regular” oscillations for FAF LFPs than for those recorded in the AC (**Fig. 2b**,  $n = 50$   
171 bursts). An indicator of the lack of regularity in AC was the “flutter” burst average, which  
172 shows that individual burst cycles were more variable (e.g. in terms of period or shape) than  
173 those in FAF, and hence more easily averaged-out. Note that, prior to averaging, bursts were  
174 normalized and aligned to their second peak. Interestingly, average  $\gamma_2$  bursts in FAF were  
175 embedded in an amplitude dip (**Fig. 2b**, bottom), signalling a relationship between low-  
176 frequency phase and high frequency power consistent with previous results in this species  
177 (Garcia-Rosales et al., 2020).

178 Waveform shape was characterized by four main cycle parameters (Cole and Voytek, 2019):  
179 rise-decay asymmetry, peak-trough asymmetry, amplitude, and period (**Fig. 2c** illustrates a  
180 schematic of their physical meaning). Representative distributions of  $\delta$ -band period values  
181 from ~20 min LFP recordings obtained from FAF and AC at a depth of 700  $\mu\text{m}$ , both  
182 recorded simultaneously, are depicted in **Fig. 2d**. Example distributions of other cycle  
183 parameters are shown in **Supplementary Figure S2**. While period values in **Fig. 2d** appeared  
184 different in frontal and auditory cortices (i.e. higher in frontal areas), another remarkable  
185 contrast emerged: the “tightness” of the distributions also differed across structures. Note that  
186 the tightness of a cycle parameter distribution indicates the variability of such parameter, and  
187 therefore it was used as an indicator of oscillatory shape “regularity” (see above). Distribution  
188 tightness was quantified for each channel across penetrations using the Fano factor as a metric  
189 (indicated in **Fig. 2d** for the example channels; Fano factor value in FAF: 9.77, in AC: 22.60).

190 Cycle parameter values and distribution tightness (Fano factor values) were systematically  
191 compared between all channel pairs, and across frequency bands. We observed significant  
192 differences in parameter values revealing that, indeed, oscillatory morphology differed  
193 between FAF and AC (**Supplementary Figure S2**). However, such outcome was not



194 unexpected, as previous work has demonstrated that oscillation shape varies across cortical  
195 regions (see (Cole and Voytek, 2017) for a review). What our results indicate is that, besides  
196 morphology, oscillatory “regularity” also differs between cortical regions. This was  
197 corroborated statistically by comparing Fano factors between areas and recording channels.  
198 Plots in **Fig. 2f** show effect size values (Cohen’s  $d$ ) across all pairwise channel comparisons  
199 (channels 1-16: FAF, channels 17-32: AC; note the schematic in **Fig. 2e**), with  $d = 0$  for  
200 comparisons that were not statistically significant (FDR-corrected Wilcoxon signed-rank  
201 tests, significance when  $p_{\text{corr}} < 0.05$ ). Channels located in FAF had significantly lower Fano  
202 factors across cycle parameters than those located in AC ( $p_{\text{corr}} < 0.05$ ; large effect sizes when  
203  $|d| > 0.8$ , red and blue colours in **Fig. 2f**), mostly for  $\delta$ ,  $\theta$ , and  $\gamma_2$  oscillations. For the latter  
204 band, however, the effect was the opposite for the parameter amplitude. Conversely, Fano  
205 factors from channels in the AC were significantly lower than those in FAF, although only in  
206 the  $\beta_1$ -band, for parameters rise-decay asymmetry and period. We noticed that cycles within  
207 oscillatory bursts were more regular in frontal or auditory cortices at frequency bands that  
208 predicted ensuing vocal type (in FAF:  $\delta$ ,  $\theta$ , and  $\gamma_2$ ; in AC:  $\beta_1$ ; see **Fig. 1**). That is, functional  
209 differences between FAF and AC were echoed by morphological differences in ongoing  
210 oscillations, indicating that a complementary functional link of FAF and AC to vocal  
211 production could also be associated to distinct underlying neural mechanisms in each cortical  
212 region.

### 213 Directed connectivity in the FAF-AC circuit during vocal production

214 Oscillations in FAF and AC predict ensuing vocal output with functionally opposite patterns,  
215 but how rhythms in this network interact during vocal production remains unknown. In  
216 previous work we reported low-frequency (1-12 Hz) phase coherence in the FAF-AC circuit  
217 during spontaneous activity, with emergence of  $\gamma$ -band ( $> 25$  Hz) coherence at the onset of  
218 external acoustic stimulation (García-Rosales et al., 2020). To study FAF-AC oscillatory  
219 dynamics during vocal production, we looked beyond phase correlations and examined causal  
220 interactions in the fronto-auditory circuit based on a transfer entropy framework. Causal  
221 interactions were quantified using directed phase transfer entropy (dPTE), a metric that  
222 measures the degree of preferential information transfer between signals based on phase time  
223 series (Hillebrand et al., 2016; Lobier et al., 2014). dPTE calculations were performed across  
224 vocal conditions for all channel pairs, and for the frequency bands of interest:  $\delta$ ,  $\theta$ ,  $\alpha$ ,  $\beta_1$ , and  
225  $\gamma_2$ .



226 Average dPTE connectivity matrices across conditions (sonar and non-sonar pre- and post-  
227 vocal periods, and no-voc segments) are illustrated in **Fig. S3**. dPTE matrices were used as  
228 adjacency matrices for directed graphs, which characterized patterns of directional  
229 information flow in the FAF-AC network (**Fig. 3**). In a graph, nodes represent pooled adjacent  
230 channels in either region, according to cortical depth: superficial (*sup*), channels 1-4 (0-150  
231  $\mu\text{m}$ ); top-middle (*mid1*), channels 5-8 (200-350  $\mu\text{m}$ ); bottom-middle (*mid2*), channels 9-12  
232 (400-550  $\mu\text{m}$ ); and *deep*, channels 13-16 (600-750  $\mu\text{m}$ ). A directed edge between any two  
233 nodes represents preferred information flow between them (e.g.  $\text{FAF}_{\text{sup}} \rightarrow \text{AC}_{\text{deep}}$ ). The  
234 strength of the directionality was quantified using a directionality index (DI), obtained from  
235 normalizing dPTE values to 0.5 (when  $\text{dPTE} = 0.5$ , there is no preferred direction of  
236 information flow). Each edge was weighted according to the DI. The existence of an edge  
237 between any two nodes was furthermore conditional on the existence of significant directed  
238 connectivity between them based on bootstrap statistics.

239 During spontaneous activity and pre-vocal periods, significant preferred information flow  
240 occurred mostly in the  $\text{FAF} \rightarrow \text{AC}$  direction, predominantly for  $\delta$ ,  $\theta$ , and  $\gamma_2$  frequencies (**Fig.**  
241 **3a, b**). Connectivity dynamics in these bands indicate that AC oscillatory activity is under  
242 top-down influences in both pre-vocal and no-voc periods. Significant  $\text{FAF} \rightarrow \text{AC}$  preferred  
243 directionality of information flow also occurred, albeit more sparsely, in the  $\alpha$  and  $\beta_1$  bands,  
244 although the patterns were more variable and differed according to the type of call (sonar vs.  
245 non-sonar) produced after the pre-vocal periods (**Fig. 3b**). Preferred information flow  
246 occurred in the  $\text{AC} \rightarrow \text{FAF}$  direction in  $\alpha$  (mostly in the pre-vocal non-sonar case) and  $\beta_1$   
247 (typically for no-voc periods) frequencies. Within-structure directionality of information flow  
248 was highest in  $\delta$  and  $\beta_1$  bands when considering pre-vocal sonar LFP segments (**Fig. 3b**).  
249 Within the FAF, information flow occurred predominantly from deep to superficial layers in  $\delta$   
250 and  $\beta_1$  frequencies. Preferential information transfer within FAF was also observed in the  $\alpha$ -  
251 band, mostly for pre-vocal sonar and no-voc periods, in the superficial-to-deep and deep-to-  
252 superficial directions, respectively. In the AC, within-structure information flow was observed  
253 for  $\gamma_2$  frequencies, both during pre-vocal non-sonar and no-voc periods.

254 Post-vocal directed connectivity patterns were conspicuously different from pre-vocal and  
255 spontaneous ones mostly in the  $\delta$  frequency band (cf. **Fig. 3c** with **Fig. 3a, b**). Whereas, in the  
256 pre-vocal sonar case, information flowed mostly in the  $\text{FAF} \rightarrow \text{AC}$  direction, in the post-  
257 vocal sonar case  $\delta$ -band information flow occurred in the  $\text{AC} \rightarrow \text{FAF}$  direction. In particular,  
258 significant connectivity in the  $\text{AC} \rightarrow \text{FAF}$  direction occurred in the post-vocal sonar case

259 (Fig. 3c, top) at  $\delta$  frequencies, originating from the  $AC_{sup}$  node (i.e. cortical depths spanning  
260 0-150  $\mu\text{m}$ ) and targeting all FAF nodes. Additionally, we observed significant  $AC \rightarrow FAF$   
261 directionality in  $\beta_1$  frequencies for the post-vocal sonar case, originating from the  $AC_{mid1}$ ,  
262  $AC_{mid2}$ , and  $AC_{deep}$  nodes (i.e. depths of 300-750  $\mu\text{m}$ ) and targeting all nodes in FAF. Other  
263 frequency bands in the post-vocal sonar and non-sonar conditions resembled the existence (or  
264 lack) of preferred information flow in the  $FAF \rightarrow AC$  direction observed in the pre-vocal case  
265 (Fig. 3b). In the frontal cortex, within-structure information flow occurred across frequency  
266 bands with various patterns: deep-to-superficial information flow for bands  $\delta$  (in sonar and  
267 non-sonar conditions),  $\alpha$  (post-vocal non-sonar), and  $\beta_1$  (both call types); we also observed  
268 superficial-to-deep information flow in the  $\alpha$  band for the post-vocal sonar condition. In the  
269 AC, within-structure information flow occurred in the deep-to-superficial direction in  $\theta$  (post-  
270 vocal non-sonar),  $\alpha$  (both call types), and  $\beta_1$  (post-vocal sonar) bands; in the superficial-to-  
271 deep direction there was information flow in  $\theta$  (post-vocal sonar; nodes  $AC_{top} \rightarrow AC_{mid2}$ ). The  
272 data presented in Fig. 3 illustrate complex patterns of information exchange within and across  
273 the FAF-AC network. Crucially, such patterns vary to a great extent depending on the type of  
274 call produced, and on the timing relative to vocal initiation.

### 275 Type of vocal output determines connectivity patterns in pre-vocal and post-vocal periods

276 To quantitatively address the variable information flow shown in Fig. 3, we compared  
277 connectivity dynamics in the FAF-AC network across vocal conditions (i.e. pre-voc, post-voc,  
278 and no-voc), for all the vocalization cases examined.

### 279 *Connectivity patterns during pre-vocal periods*

280 The top row of Fig. 4a summarizes the outcomes of such comparisons during pre-vocal  
281 periods across frequency bands, for the sonar vs. non-sonar case. Edges in the graphs are  
282 shown if there were significant differences (Wilcoxon rank sum tests, significance when  $p <$   
283  $10^{-4}$ ) with large effect sizes ( $|d| > 0.8$ ) in the directionality of information flow between two  
284 given nodes. Edges were weighted according to the effect size ( $d$ ) of the corresponding  
285 comparisons. Thus, the graphs in Fig. 4a (top) show that significant differences (with large  
286 effect sizes) between the cases of pre-vocal sonar and pre-vocal non-sonar, in terms of  $FAF$   
287  $\rightarrow AC$  connectivity, occurred only in the  $\gamma_2$ -band. Within-structure directed information flow  
288 in the FAF was significantly stronger in the pre-vocal sonar condition when considering LFPs  
289 mostly in the  $\delta$  range. However, sparse significant differences occurred also in the  $\theta$  and  $\beta_1$   
290 bands.

291 Preferred FAF → AC directionality of information flow in the  $\delta$  band was significantly higher  
292 during no-voc periods than during pre-vocal periods related to sonar vocalizations (dashed  
293 lines, **Fig. 4b**, top). For  $\gamma_2$  frequencies, the effect was the opposite: pre-vocal directionality of  
294 information flow was significantly higher than that of no-voc periods. Within-structure  
295 interactions were strongest in FAF, where the directionality of information flow from bottom  
296 to top layers was significantly higher during pre-vocal sonar periods as compared to the other  
297 two conditions, in the  $\delta$  and  $\beta_1$  bands; the opposite effect was more sparsely seen for  $\alpha$   
298 frequencies (**Fig. 4b**, top). Significant differences in the directionality of information flow  
299 between non-sonar and no-voc conditions were for the largely inexistent (**Fig. 4c**, top; but  
300 note sparse significance in the FAF→AC direction, for the  $\delta$ -band).

301 To summarize changes in the directionality of information flow between frontal and auditory  
302 cortices, we calculated the net information outflow ( $DI_{\text{net}}$ ) of each area as the sum of the  
303 directionality indexes related to outgoing connections from each region. For instance, the  
304  $DI_{\text{net}}$  of the FAF is the sum of all the edges (i.e. directionality indexes) associated with FAF  
305 → AC connections, thus quantifying the net strength of preferential FAF → AC information  
306 outflow. Significant differences in the strength of information outflow across conditions  
307 (sonar vs. non-sonar, sonar vs. no-voc, and non-sonar vs. no-voc; **Fig. 4a-c**, bottom) occurred  
308 with large effect sizes ( $|d| > 0.8$ ) only in the  $\delta$  and  $\gamma_2$  bands, when considering information  
309 outflow from the FAF. Specifically, FAF-related net information outflow in the  $\gamma_2$  band was  
310 significantly (FDR-corrected Wilcoxon rank sum tests,  $p_{\text{corr}} < 0.05$ ) higher when animals  
311 vocalized sonar calls as compared to when animals produced non-sonar calls (**Fig. 4a**;  $p_{\text{corr}} =$   
312  $1.05 \times 10^{-83}$ ,  $d = 1.52$ ) or no call whatsoever (**Fig. 4b**;  $p_{\text{corr}} = 5.23 \times 10^{-65}$ ,  $d = 1.26$ ). Conversely,  
313  $\delta$ -band net information outflow was significantly higher during no-voc periods as compared  
314 to the pre-vocal sonar (**Fig. 4b**;  $p_{\text{corr}} = 3.37 \times 10^{-46}$ ,  $d = -1.02$ ) and, although less prominently,  
315 the pre-vocal non-sonar conditions (**Fig. 4c**;  $p_{\text{corr}} = 1.97 \times 10^{-26}$ ,  $d = -0.73$ ).

### 316 *Connectivity patterns during post-vocal periods*

317 We also observed major differences in connectivity during post-vocal periods between  
318 vocalization conditions (**Fig. 5**). Preferential top-down information flow was significantly  
319 lower for sonar calls than for non-sonar vocalizations in  $\delta$  and  $\beta_1$  frequencies, but  
320 significantly higher in the  $\gamma_2$  band (**Fig. 5a**, top;  $p < 10^{-4}$ ,  $|d| > 0.08$ ). Remarkably, post-vocal  
321 preferred directionality of information flow in the  $\delta$  and  $\beta_1$  bands was strongest in the bottom-  
322 up direction (AC → FAF) for the sonar condition, as opposed to the non-sonar one. Similar

323 effects were seen when comparing connectivity patterns obtained from post-vocal sonar and  
324 no-voc periods (**Fig. 5b**, top). In other words, the post-vocal non-sonar condition exhibited the  
325 weakest top-down information transfer and the strongest bottom up-information flow in bands  
326  $\delta$  and  $\beta_1$ . Top-down  $\gamma_2$  causal influences remained strongest when animals vocalized a sonar  
327 call, as compared to non-sonar call production or no-voc periods. Within area changes were  
328 observed in the  $\alpha$ -band in FAF, where preferential superficial-to-deep information transfer  
329 was significantly higher for sonar vocalizations (**Fig. 5a**), while deep-to-superficial  
330 information flow was strongest in post-vocal non-sonar and no-voc related periods (**Fig. 5b**,  
331 **c**). Finally, significant differences between post-vocal non-sonar and spontaneous activity  
332 (**Fig. 5c**, top) were limited to  $\delta$  frequencies, and strongest for no-voc LFPs.

333 We compared the net information outflow across conditions in each structure for post-vocal  
334 periods (**Fig. 5a-c**, bottom). In the  $\delta$ -band, preferred information outflow from the FAF was  
335 weakest (with large effect sizes) when animals vocalized sonar calls (FDR-corrected  
336 Wilcoxon rank sum tests; sonar vs. non-sonar: **Fig. 5a**,  $p_{\text{corr}} = 9.74 \times 10^{-99}$ ,  $d = -1.58$ ; sonar vs.  
337 no-voc: **Fig. 5b**,  $p_{\text{corr}} = 1.90 \times 10^{-171}$ ,  $d = -4.2$ ). A similar effect was observed when comparing  
338 non-sonar  $DI_{\text{net}}$  values with no-voc ones: preferential post-vocal net information outflow from  
339 FAF was significantly lower for vocalization-related LFPs (**Fig. 5c**,  $p_{\text{corr}} = 2.45 \times 10^{-130}$ ,  $d = -$   
340 2.3). Similarly, post-vocal  $DI_{\text{net}}$  values for the  $\beta_1$ -band in the FAF were significantly stronger  
341 during non-sonar than during sonar vocal production with large effect size (**Fig. 5a**,  $p_{\text{corr}} =$   
342  $3.18 \times 10^{-37}$ ,  $d = 0.81$ ). Significant differences in the same frequencies, but between post-vocal  
343 sonar and no-voc periods (**Fig. 5b**) did not occur with a large effect size ( $p_{\text{corr}} = 3.4 \times 10^{-19}$ ,  $d =$   
344 0.61). In contrast,  $\gamma_2$ -related net information outflow from FAF was always strongest in the  
345 case of sonar vocalizations (sonar vs. non-sonar: **Fig. 6a**,  $p_{\text{corr}} = 8.89 \times 10^{-115}$ ,  $d = 2.0$ ; sonar vs.  
346 no-voc: **Fig. 7b**,  $p_{\text{corr}} = 7.95 \times 10^{-90}$ ,  $d = 1.59$ ).

347 The predominance of bottom-up information transfer in low frequencies, dependant on the  
348 type of call produced, was evident when considering  $DI_{\text{net}}$  values. In the  $\delta$ -band, net  
349 information outflow from AC was significantly stronger, with large effect sizes, during sonar  
350 production than for post-vocal non-sonar or no-voc periods (sonar vs. non-sonar: **Fig. 5a**,  $p_{\text{corr}}$   
351  $= 2.68 \times 10^{-82}$ ,  $d = 1.2$ ; sonar vs. no-voc: **Fig. 7b**,  $p_{\text{corr}} = 1.61 \times 10^{-124}$ ,  $d = 1.49$ ). Also in the  $\beta_1$ -  
352 band, net information outflow from AC was strongest for post-vocal sonar than non-sonar  
353 periods (**Fig. 5a**;  $p_{\text{corr}} = 6.31 \times 10^{-38}$ ,  $d = 0.81$ ). However, significant changes between sonar  
354 and no-voc cases in the same frequency band did not occur with large effect size (**Fig. 5b**;  
355  $p_{\text{corr}} = 5.48 \times 10^{-16}$ ,  $d = 0.46$ ). Differences in other frequency bands, or other across-condition

356 comparisons (e.g. non-sonar vs. no-voc, **Fig. 5c**, bottom), were either not reflected in the  
357 differential connectivity graphs, or did not have large effect sizes.

358 Altogether, these results indicate that pre-vocal and post-vocal directional information flow in  
359 the FAF-AC network occurs mostly in low and high-frequency bands. The patterns and  
360 strength of preferred directionality not only depend on whether a vocalization is produced, but  
361 also on the type of vocal output. Crucially, when animals produced non-sonar calls, post-  
362 vocal bottom-up influences dominated in  $\delta$  frequencies, while top-down influences weakened  
363 in post-vocal periods compared to spontaneous activity. These results could reflect both a  
364 waning of top-down control from the FAF, and an increase in bottom-up transfer in  $\delta$  and  $\beta_1$   
365 frequencies. These two possible explanations are not mutually exclusive, and in fact both  
366 phenomena may occur in our dataset.

#### 367 Preferred direction of information flow changes between pre-vocal and post-vocal periods

368 Differences in the directionality of information flow between pre-vocal and post-vocal  
369 activities were addressed by statistically comparing connectivity graphs associated to each  
370 case (**Fig. 6**). This is a similar approach to the across-condition comparisons shown in **Figs. 4**  
371 and **5**. However, note that paired statistics were performed for these comparisons (Wilcoxon  
372 signed-rank tests, significance when  $p < 10^{-4}$ ; see Methods).

373 In our dataset, FAF  $\rightarrow$  AC preferred information flow was significantly higher (with large  
374 effect sizes,  $|d| > 0.8$ ) for pre-vocal periods than for post-vocal ones in the  $\delta$  and  $\theta$  bands (**Fig.**  
375 **6a**, top). For  $\gamma_2$  frequencies, the effect was the opposite: FAF  $\rightarrow$  AC directionality was highest  
376 during post-vocal periods than during pre-vocal ones, with sparse significant differences.  
377 Remarkably, AC  $\rightarrow$  FAF preferred directionality of information flow was significantly  
378 stronger during post-vocal periods in  $\delta$  and  $\beta_1$  frequency bands (**Fig. 6a**). In frontal cortex,  
379 differences in within-structure directionality of information flow occurred in frequency bands  
380  $\delta$ ,  $\alpha$ , and  $\beta_1$ . In the AC, within structure differences in information flow occurred mostly in  $\alpha$   
381 and  $\beta_1$  bands (although also less consistently in  $\theta$  and  $\gamma_2$ , **Fig. 6a**), being strongest in the deep-  
382 to-superficial direction during post-vocal periods, and in superficial-to-deep directions during  
383 pre-vocal periods. Finally, when considering the case of non-sonar call production (**Fig. 6b**,  
384 top), differences in the directionality of information flow occurred only in the  $\delta$  and  $\theta$  bands,  
385 being significantly higher (with large effect sizes) in the FAF  $\rightarrow$  AC direction for pre-vocal  
386 periods than for post-vocal ones.

387 We calculated the net information outflow ( $DI_{\text{net}}$ ) from FAF and AC in order to statistically  
388 compare pre-vocal and post-vocal periods in terms of information transfer from each cortical  
389 area. Significant differences (FDR-corrected Wilcoxon signed-rank tests, significance for  $p_{\text{corr}}$   
390  $< 0.05$ ) with large effect sizes ( $|d| > 0.8$ ) occurred mostly for low and intermediate frequency  
391 bands (i.e.  $\delta$  and  $\beta_1$ ) of the LFP. Specifically, for the pre-vocal vs. post-vocal sonar condition  
392 (**Fig. 6a**, bottom), the information outflow from FAF was significantly higher in the  $\delta$  band  
393 during pre-vocal periods related to sonar call production ( $p_{\text{corr}} = 1.87 \times 10^{-82}$ ,  $d = -3.18$ ).  
394 Notably, the net information outflow from AC was significantly higher when considering  
395 post-vocal periods than pre-vocal ones ( $p_{\text{corr}} = 4.04 \times 10^{-63}$ ,  $d = -1.49$ ). In the  $\beta_1$  frequency  
396 range, there were no significant differences (with large effect sizes) between pre-vocal and  
397 post-vocal net information outflow from the FAF. However,  $DI_{\text{net}}$  values from AC were  
398 significantly different with large effect size during post-vocal periods than during pre-vocal  
399 ones ( $p_{\text{corr}} = 3.94 \times 10^{-34}$ ,  $d = -0.87$ ). Pre-vocal vs. post-vocal comparisons of net information  
400 outflow from FAF and AC related to non-sonar vocalizations revealed only significant  
401 differences with large effect sizes for  $\delta$  frequencies in FAF (**Fig. 6b**, bottom). Here, net  
402 information outflow was strongest in pre-vocal periods than in post-vocal ones ( $p_{\text{corr}} =$   
403  $2.79 \times 10^{-67}$ ,  $d = 1.54$ ). Other differences related to  $DI_{\text{net}}$  values occurred but were either not  
404 reflected in the differential connectivity graphs (**Fig. 6**, top), or did not have large effect sizes.  
405 These results confirm dynamic changes of predominant connectivity patterns in the FAF-AC  
406 network from pre-vocal to post-vocal periods, exhibiting frequency specificity and occurring  
407 only when animals produce sonar vocalizations.

## 408 Discussion

409 In this study, we addressed the neural dynamics in frontal and auditory cortices during vocal  
410 production. Our main findings are as follows (summarized in **Fig. 7**): (i) pre-vocal LFP power  
411 in sensory (AC) and association (FAF) cortices predict vocalization type, with LFP frequency  
412 specificity and complementary effects across cortical regions; (ii) functional differences  
413 between FAF and AC are likely related to distinct neural mechanisms, based on differences  
414 on oscillatory morphology; (iii) LFPs in frontal and auditory cortices are causally related  
415 (within a TE framework) during vocal production and spontaneous activity; and (iv)  
416 connectivity patterns in the FAF-AC network differed across behavioural states (vocalization  
417 and spontaneous activity), depended on call type (sonar or non-sonar), and occurred in a  
418 frequency specific manner. These findings provide a view on the cortico-cortical network  
419 interactions that occur during vocalization in highly vocal mammals.



420 Pre-vocal LFP power in frontal and auditory cortices predicts ensuing call type

421 Consistent with previous reports (Gavrilov et al., 2017; Hage and Nieder, 2013; Weineck et  
422 al., 2020), our data indicate that neural activity in the frontal cortex predicts vocal output.  
423 Thus, oscillations in frontal regions appear instrumental for vocal control. Such position is  
424 supported by several lines of evidence, including those below. First, oscillations in the  
425 mammalian frontal cortex are involved in cognitive processes and behavioural (also motor)  
426 coordination (Gilmartin et al., 2014; Helfrich and Knight, 2016; Pezze et al., 2014). Second,  
427 pre-vocal LFP power in frontal areas predicts ensuing call type ((this study, and (Weineck et  
428 al., 2020)). Third, low-frequencies in the bat frontal cortex exhibit synchronization patterns  
429 with the dorsal striatum (a basal ganglial structure connected to canonical vocal control  
430 pathways (Simonyan and Jurgens, 2003)) that are call-type specific (Weineck et al., 2020).  
431 Fourth, frontal and auditory oscillatory activities, beyond being phase-synchronized during  
432 vocalization (e.g. in humans, (Kinyon et al., 2015)), are causally related with strong top-  
433 down influences during pre-vocal periods (current data). We note, however, that the  
434 relationship of pre-vocal oscillatory activity and vocalization type shown in this study remains  
435 correlational: our data do not establish a causal role of LFPs for the initiation or planning of  
436 sonar or non-sonar calls in the bat FAF.

437 Neural activity in the AC also relates to vocalization (Eliades and Wang, 2003), but the  
438 involvement of cortical oscillations in vocal production had so far not been thoroughly  
439 examined (see however (Tsunada and Eliades, 2020)). Our results indicate that pre-vocal  
440 auditory cortical LFPs, as previously reported with single-unit spiking, relate to vocal  
441 initiation. Interestingly, the pre-vocal spectral changes of LFPs in AC were complementary to  
442 those seen in the FAF (see **Fig. 1**). Unlike in the FAF, significant pre-vocal power changes in  
443  $\delta$ - $\alpha$  and  $\gamma_2$  bands in AC were not call-type specific. Only in the AC, pre-vocal power changes  
444 in  $\beta_1$  predicted whether animals produced sonar or non-sonar calls. While a strongest power  
445 increase in FAF signalled the production of a sonar call, higher pre-vocal power in AC was a  
446 signature of non-sonar vocalization. Such interesting functional divergences between frontal  
447 and auditory regions was accompanied by differences in oscillatory morphology (**Fig. 2**),  
448 underscoring the possibility of distinct origins for oscillatory processes within each area.

449 It is possible to interpret the dynamics of pre-vocal power in AC considering the neural  
450 mechanisms related to vocal production in this structure. Neuronal activity in the AC is  
451 predominantly suppressed during vocalization, with inhibition at the single neuron level



452 already occurring hundreds of milliseconds prior to call onset (Eliades and Wang, 2003, 2008;  
453 Flinker et al., 2010; Forseth et al., 2020). Inhibition in the AC is mediated by motor control  
454 regions, which send a copy of the planned motor command to the auditory system (i.e.  
455 “corollary discharge” or “efferent copy” signals; (Eliades and Wang, 2013)). A recent study  
456 (Li et al., 2020) suggested a distinction between these signals: the first having an overall  
457 suppressive effect, independently of the sound being produced; the second carrying specific  
458 information about the sound generated, potentially enhancing its future processing. Thus, pre-  
459 vocal power changes in low frequencies, undistinguishable across call types, could reflect  
460 general inhibitory mechanisms in AC consistent with corollary discharges mediated by  
461 higher-order structures. Indeed, our results from causality analyses support the notion of top-  
462 down (FAF  $\rightarrow$  AC) control of pre-vocal low-frequency activity. On the other hand, pre-vocal  
463  $\beta$ -band LFPs might constitute oscillatory correlates of efference copies, given the observed  
464 call-type specificity (**Fig. 1**). Because FAF  $\rightarrow$  AC causal influences did not equally extend to  
465 the  $\beta$  frequencies, pre-vocal  $\beta$  activity in AC might be influenced instead by specialized  
466 regions such as the motor cortex, providing a more specific copy of the motor commands  
467 required for vocalization. Channels for motor-auditory communication (see (Nelson et al.,  
468 2013)) could in fact operate over  $\beta$  frequencies (Abbasi and Gross, 2020; Ford et al., 2008;  
469 Franken et al., 2018).

#### 470 Cycle morphology in FAF and AC: implications of oscillatory regularity

471 Oscillations in frontal and auditory cortices are not only functionally, but also  
472 morphologically different (**Fig. 2, S2**). Oscillatory morphology reflects the cellular properties  
473 of the generators responsible for recorded mesoscopic rhythms such as LFPs, or EEGs (Cole  
474 and Voytek, 2019). In that sense, oscillatory shape differences across cortical areas are likely  
475 related to cytoarchitectural differences, and could in fact correlate with the specific functional  
476 properties of distinct cortical structures (reviewed in (Cole and Voytek, 2017)). Nevertheless,  
477 beyond a direct morphological perspective, our data revealed a remarkable trend: oscillatory  
478 regularity differed significantly between frontal and auditory cortices. Differences in  
479 regularity (**Fig. 2**) suggest that LFPs in FAF are generated by local networks that oscillate  
480 with tighter parameters.

481 Cycle parameter regularities in FAF and AC provide an interesting perspective on the  
482 functional roles of oscillatory processes within each structure. For example, it is possible to  
483 speculate that more regular oscillators in FAF could be beneficial for robust interareal

484 communication, which capitalizes on the phase coherence of low and high frequency rhythms  
485 (Fries, 2015). Consistent oscillatory activity may act as a reference frame for long-distance  
486 interactions, from a central coordinator such as the frontal cortex. This could support  
487 cognitive control mechanisms, which rely on low-frequency synchrony between frontal areas  
488 and a plethora of brain regions, including sensory cortices (Helfrich and Knight, 2016).  
489 Conversely, the AC is a crucial auditory processing structure whose oscillatory activity  
490 synchronizes to slow -and fast- rhythms present in external stimuli (García-Rosales et al.,  
491 2018; Gross et al., 2013; Kayser et al., 2009; Lakatos et al., 2007; Lakatos et al., 2013;  
492 Lakatos et al., 2005; O'Connell et al., 2015). Importantly, oscillations in AC phase-align with  
493 external rhythms even when these are not fully periodic (i.e. quasi-periodic), such as speech  
494 and natural vocalizations (Giraud and Poeppel, 2012), which requires at least some degree of  
495 flexibility (see (Pittman-Polletta et al., 2020)). Less regular oscillators in AC than in FAF  
496 could represent a marker of such flexibility, as low-frequency auditory cortical oscillations  
497 vary over a wider range of parameters (**Fig. 2**) that could accommodate the variability of the  
498 natural rhythms that are to be represented and encoded.

#### 499 Causal interactions in the FAF-AC network during sonar and non-sonar vocal production

500 In frontal and auditory cortices, oscillations provide a correlate of vocal production with  
501 complementary patterns. In addition, our results uncovered rich causal interactions (within a  
502 TE framework) in the FAF-AC circuit with functional relationships to vocalization. In a  
503 recent study, we demonstrated that low-frequency FAF-AC coherence occurs even in the  
504 absence of acoustic stimulation (i.e. during spontaneous activity; (García-Rosales et al.,  
505 2020)). The current results show that interactions in the network go beyond phase  
506 correlations, and that during spontaneous activity information flows in low ( $\delta$ - $\alpha$ ) and high ( $\gamma_2$ )  
507 frequency bands preferentially from frontal to auditory regions, thus denoting causal top-  
508 down influences. Low-frequency top-down influences from higher-order structures (like the  
509 FAF) are thought to modulate neuronal activity in sensory cortices according to cognitive  
510 variables such as attention, also during spontaneous activity (Fox et al., 2006; Hillebrand et  
511 al., 2016; Sang et al., 2017). Attentional modulation from frontal regions facilitates the  
512 efficient and selective representation of external stimuli depending on internal behavioural  
513 states, which were, however, not explicitly controlled by us during no-voc periods in this  
514 study. In general, our data resonate with the hypothesis of spontaneous top-down modulation  
515 of oscillatory activity in AC, and suggest a strict control of higher-order structures over  
516 sensory areas reflected in concurrent LFP activity across regions.

517 During pre-vocal periods, we observed changes in the strength of the directionality of  
518 information flow related to the vocalization of sonar calls. These changes revealed intriguing  
519 transmitter/receiver dynamics in the FAF-AC network that relate to the preparation of a vocal  
520 output, and the neural processing of the consequent acoustic inputs such output entails.  
521 Consistent with the proposed roles of frontal structures for vocal control, we observed  
522 increased within-structure information flow in the FAF prior to vocalization. The dPTE  
523 patterns expand the results demonstrating that pre-vocal, frontal LFP power in low- and high-  
524 frequencies is a robust correlate of vocal production. Still, it is important to note that  
525 vocalization-specific changes in power may affect causality estimations, e.g. by creating  
526 confounding differences between the vocal conditions studied. However, the dPTE is a  
527 causality estimate that shows robustness to the influence of power, noise, and other variables  
528 (Lobier et al., 2018; Young et al., 2017). In our dataset, the pre-vocal  $\delta$ -band power increase  
529 within each region when animals produced sonar vocalizations (call-type specific in FAF,  
530 unspecific in AC) was nonetheless accompanied by a decrease of interareal dPTE values. In  
531 addition, a  $\delta$ -band power increase of non-sonar pre-vocal LFPs relative to baseline (**Figs. 1,**  
532 **S1**) did not result in significant differences of dPTE values during pre-vocal and spontaneous  
533 periods. Thus, changes in causality did not necessarily follow changes in power, as has been  
534 reported in previous work (Hillebrand et al., 2016).

535 Based on the fact that dPTE values related to top-down influences were lowest during pre-  
536 vocal sonar periods (**Figs. 3, 4**), it appears that as animals prepare a sonar vocalization, the  
537 FAF gradually relinquishes control over the AC in the low-frequency ( $\delta$ ) channel. The  
538 weakening of preferred top-down directional information transfer could be taken as a  
539 preamble of emerging bottom-up information flow (i.e. in the AC→FAF direction) in  $\delta$   
540 frequencies after a sonar call is emitted (**Figs. 5, 6**). Remarkably, the same does not happen in  
541 the non-sonar case. Echolocation is a vital behaviour for bats, being the predominant strategy  
542 for sampling the environment during navigation. After vocalizing a sonar pulse, the bat  
543 auditory system must be ready to process incoming echoes and to use this auditory  
544 information to construct a representation of surrounding objects (Simmons, 2012), potentially  
545 involving higher order structures. The observed switch from top-down to bottom-up  
546 processing when animals find themselves in echolocation mode (**Fig. 6**) could in fact  
547 represent the readiness of the bat's auditory machinery for the aforementioned task.  
548 Concretely, our data suggest that the former may occur over a continuum encompassing a  
549 gradual release of the AC from top-down influences (in this case, stemming from the FAF),

550 which in turn opens the way for auditory-frontal information transfer supporting the  
551 processing and integration of incoming echoes. In all, processing feedback information  
552 directly related to navigation appears to have a larger weight in the bottom-up processing of  
553 acoustic cues resulting from a self-generated sound. Echolocation pulses are produced to  
554 generate echoes that must be listened to. Communication calls are often targeted to an  
555 audience as means of transmitting internal behavioural information (e.g. distress), not aimed  
556 at the emitter itself. For the emitter, in such scenario, feedback processing mostly contributes  
557 to the adjustment of vocal parameters such as loudness or pitch (Behroozmand et al., 2009;  
558 Eliades and Tsunada, 2018; Eliades and Wang, 2012). Since in this study animals vocalized  
559 without an audience (i.e. they were isolated in the recording chamber), further research could  
560 elucidate whether the presence of conspecifics (i.e. an audience) increases bottom-up  
561 information transfer when vocalizing communication calls.

562 In conclusion, we show that oscillations in frontal and auditory cortices provide a neural  
563 correlate of vocal production with remarkable complementary effects across regions. We  
564 further demonstrate the existence of complex bi-directional connectivity patterns in the FAF-  
565 AC network. The observed top-down influences during pre-vocal periods are consistent with  
566 preparatory signals in AC related to vocal initiation which could have frontal or motor cortical  
567 provenance. These information flow patterns changed dynamically according to vocalization  
568 type and to the timing relative to vocal onset. Crucially, the emergence of strong bottom-up  
569 causal influences in the FAF-AC network, only for post-vocal periods associated to sonar call  
570 utterance, suggests that the connectivity in the fronto-auditory circuit is shaped by the  
571 behavioural implications of the calls produced.

## 572 **Methods**

### 573 Animal preparation and surgical procedures

574 The study was conducted on three awake *Carollia perspicillata* bats (all males). Experimental  
575 procedures were in compliance with European regulations for animal experimentation and  
576 were approved by the Regierungspräsidium Darmstad (experimental permit #FU-1126). Bats  
577 were obtained from a colony at the Goethe University, Frankfurt. Animals used for  
578 experiments were kept isolated from the main colony.

579 Prior to surgical procedures, bats were anaesthetized with a mixture of ketamine (10  
580 mg\*kg<sup>-1</sup>, Ketavet, Pfizer) and xylazine (38 mg\*kg<sup>-1</sup>, Rompun, Bayer). For surgery and for

581 any subsequent handling of the wounds, a local anaesthetic (ropivacaine hydrochloride, 2  
582 mg/ml, Fresenius Kabi, Germany) was applied subcutaneously around the scalp area. A  
583 rostro-caudal midline incision was cut, after which muscle and skin tissues were carefully  
584 removed in order to expose the skull. A metal rod (ca. 1 cm length, 0.1 cm diameter) was  
585 attached to the bone to guarantee head fixation during electrophysiological recordings. The  
586 FAF and AC were located by means of well-described landmarks, including the sulcus  
587 anterior and prominent blood vessel patterns (see (Eiermann and Esser, 2000; Esser and  
588 Eiermann, 1999; García-Rosales et al., 2020)). The cortical surface in these regions was  
589 exposed by cutting small holes (ca. 1 mm<sup>2</sup>) with the aid of a scalpel blade on the first day of  
590 recordings. In the AC, recordings were made mostly in the high frequency fields (Eiermann  
591 and Esser, 2000; Esser and Eiermann, 1999; García-Rosales et al., 2020))

592 After surgery, animals were given no less than two days of rest before the onset of  
593 experiments. No experiments on a single animal lasted longer than 4 h per day. Water was  
594 given to the bats every 1-1.5 h periods, and experiments were halted for the day if the animal  
595 showed any sign of discomfort (e.g. excessive movement). Bats were allowed to rest a full  
596 day between consecutive experimental sessions.

#### 597 Electrophysiological and acoustic recordings

598 Electrophysiology was performed chronically in fully awake animals, inside a sound-proofed  
599 and electrically isolated chamber. Inside the chamber, bats were placed on a custom-made  
600 holder which was kept at a constant temperature of 30 °C by means of a heating blanket  
601 (Harvard, Homeothermic blanket control unit). Electrophysiological data were acquired from  
602 FAF and AC on the left hemisphere, using two 16-channel laminar electrodes (one per  
603 structure; Model A1x16, NeuroNexus, MI; 50 µm channel spacing, impedance: 0.5-3 MW per  
604 electrode). Probes were carefully inserted into the brain perpendicular to the cortical surface,  
605 and lowered with piezo manipulators (one per probe; PM-101, Science 455 products GmbH,  
606 Hofheim, Germany) until the top channel was barely visible above the surface of the tissue.  
607 The placing and properties of the probes allowed us to record simultaneously at depths  
608 ranging from 0-750 µm, spanning all six cortical layers (see (Garcia-Rosales et al., 2019)).  
609 Probes were connected to a micro-preamplifier (MPA 16, Multichannel Systems, MCS  
610 GmbH, Reutlingen, Germany), and acquisition was done with a single, 32-channel portable  
611 system with integrated digitization (sampling frequency, 20 kHz; precision, 16 bits) and  
612 amplification steps (Multi Channel Systems MCS GmbH, model ME32 System, Germany).

613 Acquisition was online-monitored and stored in a computer using the MC\_Rack\_Software  
614 (Multi Channel Systems MCS GmbH, Reutlingen, Germany; version 4.6.2).

615 Vocal outputs were recorded by means of a microphone (CMPA microphone, Avisoft  
616 Bioacustics, Glienicke, Germany) located 10 cm in front of the animal. Recordings were  
617 performed with a sampling rate of 250 kHz and a precision of 16 bits. Vocalizations were  
618 amplified (gain = 0.5, Avisoft UltraSoundGate 116Hm mobile recording interface system,  
619 Glienicke, Germany) and then stored in the same PC used for electrophysiology.

620 Electrophysiological and acoustic data were aligned using two triggers, an acoustic one (5  
621 kHz tone, 10 ms long) presented with a speaker located inside of the chamber (NeoCD 1.0  
622 Ribbon Tweeter; Fountek Electronics), and a TTL pulse sent to the recording system for  
623 electrophysiology (see above). Note that the onsets of the tones were in synchrony with the  
624 TTL pulses registered by the acquisition system for electrophysiology.

#### 625 Classification of vocal outputs

626 Two sessions of concurrent acoustic recordings (~10 min long) were made per paired  
627 penetrations in FAF and AC. Vocalizations were automatically detected based on the acoustic  
628 envelope of the recordings. The envelope was z-score normalized to a period of no  
629 vocalization (no less than 10 s long), which was manually selected, per file, after visual  
630 inspection. If a threshold of 5 standard deviations was crossed, a vocalization occurrence was  
631 marked and its start and end times were saved. Given the stereotyped spectral properties of *C.*  
632 *perspicillata*'s echolocation calls, a preliminary classification between sonar and non-sonar  
633 utterances was done based on each call's peak frequency (a peak frequency > 50 kHz  
634 suggested a sonar vocalization, whereas a peak frequency below 50 kHz suggested a non-  
635 sonar call). In addition, vocalizations were labelled as candidates for posterior analyses if  
636 there was a time of silence no shorter than 500 ms prior to call production to ensure no  
637 acoustic contamination on the pre-vocal period that could affect LFP measurements in FAF or  
638 AC. Finally, sonar and non-sonar candidate vocalizations were individually and thoroughly  
639 examined via visual inspection to validate their classification (sonar or non-sonar), the  
640 absence of acoustic contamination in the 500 ms prior to vocal onset, and the correctness of  
641 their start and end time stamps. According to the above, and out of a total of 12494 detected  
642 vocalizations, 147 sonar and 725 non-sonar calls were then used in further analyses.



## 643 Extraction of LFP signals and power analysis

644 Data analyses were performed using custom-written scripts in MatLab (version 9.5.0.1298439  
645 (R2018b)), Python (version 2.6 or 3.6), and R (RStudio version 1.3.1073). For extracting  
646 LFPs, the raw data were band-pass filtered (zero-phase) between 0.1 and 300 Hz (4<sup>th</sup> order  
647 Butterworth filter; *filtfilt* function, MatLab), after which the signals were downsampled to 1  
648 kHz.

649 All LFP spectral analyses were done using the Chronux toolbox (Bokil et al., 2010). Peri-  
650 vocal (i.e. times of -500 - 250 ms relative to vocalization onset) spectrograms (shown in **Fig.**  
651 **1e**) were obtained using the function *mtspectrumc* with a window of 150 ms, which was slid  
652 with 10 ms steps, using 3 tapers with a time-bandwidth product (TW) of 2. Pre-vocal power  
653 was calculated with LFP segments spanning -500-0 ms relative to vocal onset, using a TW of  
654 2, and 3 tapers. No-vocalization baseline periods (*no-voc*) with a length of 500 ms were  
655 pseudo-randomly selected and their power spectra calculated in order to obtain baseline  
656 power values for spontaneous activity. The total number of *no-voc* periods matched the total  
657 number of vocalizations ( $n = 872$ ), in a way that the number of selected *no-voc* periods per  
658 recording file matched the number of vocalizations found in that particular file. The power of  
659 individual frequency bands (i.e.  $\delta$ , 1-4 Hz;  $\theta$ , 4-8 Hz;  $\alpha$ , 8-12 Hz;  $\beta_1$ , 12-20 Hz;  $\beta_2$ , 20-30 Hz;  
660  $\gamma_1$ , 30-60 Hz;  $\gamma_2$ , 60-120 Hz;  $\gamma_3$ , 120-200 Hz) was calculated by integration of the power  
661 spectral density accordingly for each case. Finally, the increase of pre-vocal power relative to  
662 the baseline periods was calculated as follows (per frequency band, on a call-by-call basis):

$$663 \quad \text{Relative power change} = \frac{BP_{pre-voc} - BP_{no-voc}}{BP_{no-voc}} * 100 \quad [1],$$

664 where  $BP_{pre-voc}$  is the pre-vocal power (in the case of either a sonar or non-sonar vocalization)  
665 of the given frequency band and a trial (i.e. a specific call), and  $BP_{no-voc}$  is the baseline no-voc  
666 power associated to the same frequency band and trial.

## 667 Generalized linear model for vocal output prediction

668 To determine whether pre-vocal power change relative to baseline was able to predict the type  
669 of ensuing vocal output, we used a GLM with a logistic link function (i.e. logistic regression).  
670 The model analysis was done in Rstudio with the *lme4* package. In brief, logistic regression  
671 was used to predict the probability of a binary outcome (0 or 1; non-sonar or sonar,



672 respectively) based on the pre-vocal power change as the predictor variable. The probabilities  
673 are mapped by the inverse logit function (sigmoid):

674 
$$\sigma(x) = \frac{1}{1+\exp(-x)} \quad [2],$$

675 which restricts the model predictions to the interval [0, 1]. Because of these properties, a  
676 logistic regression with GLMs is well suited to compare data (and thus, evaluate predictions  
677 of ensuing vocal-output) on a single-trial basis (Zempeltzi et al., 2020).

678 To estimate the effect size of the fitted models, we used the marginal coefficient of  
679 determination ( $R^2_m$ ) with the *MuMIn* package. The  $R^2_m$  coefficient quantifies the variance  
680 in the dependent variable (sonar vs. non-sonar vocalization) explained by the predictor  
681 variable (i.e. the relative pre-vocal power change). This value is dimensionless and  
682 independent of sample size (Nakagawa and Schielzeth, 2013; Zempeltzi et al., 2020), which  
683 makes it ideal to compare effect sizes of different models (e.g. across channels and frequency  
684 bands, as in **Fig. 2e**). Effect sizes were considered small when  $R^2_m < 0.1$ , medium when  $R^2_m$   
685  $\geq 0.1$ , and large when  $R^2_m \geq 0.4$  (Zempeltzi et al., 2020).

#### 686 Cycle-by-cycle analysis of oscillations

687 The evaluation of individual cycle parameters for ongoing oscillations in FAF and AC was  
688 done with the *bycycle* package in Python (Cole and Voytek, 2019), and custom-written  
689 MatLab scripts for statistical analyses. The *bycycle* package makes possible to detect of  
690 individual oscillatory cycles at a given frequency band, and to determine whether such cycles  
691 are part of oscillatory bursts (in this study, defined as no less than 3 cycles with stable  
692 properties; see below). This approach does not require narrowband-filtering and, by  
693 calculating cycle parameters directly on the raw LFP data, avoids methods which rely on  
694 sinusoidal basis (such as, for example, Hilbert transforming narrow-band signals).

695 Burst detection depends on four key parameters that characterize the shape of an individual  
696 cycle: rise-decay time asymmetry, peak-to-trough asymmetry, period, and amplitude. A  
697 schematic illustrating the meaning of these features is given in **Fig. 3c**. The specific  
698 parameters used for the *bycycle* burst detection algorithm are given in **Supplementary Table**  
699 **1**. Only cycles that were found within detected bursts were considered for further analysis.

700 Cycle parameters characterize the underlying oscillatory dynamics (Cole and Voytek, 2019),  
701 with more tightly distributed parameters for a given LFP signal suggesting more “regular”

702 oscillations. Note that the former does not mean that the oscillation is more or less symmetric,  
703 for example, but it does imply a higher consistency of shape. The tightness of a distribution of  
704 a parameter (e.g. the period) across cycles was quantified with the Fano factor:

$$705 \quad F = \frac{\sigma_W^2}{\mu_W} \quad [3],$$

706 where  $\sigma_W^2$  is the variance of the distribution ( $W$ ), and  $\mu_W$  its mean.

707 Fano factors were calculated in FAF and AC, for every channel, frequency band, and cycle  
708 parameter. That is, the Fano factor of a channel at a given frequency band and parameter  
709 condenses all burst cycles found. It was therefore possible to perform paired statistical  
710 comparisons across channels (and thus, also across structures), using signals that were  
711 simultaneously recorded (i.e. paired penetrations in FAF and AC,  $n = 30$ ; FDR-corrected  
712 Wilcoxon signed rank tests, significance when  $p_{\text{corr}} < 0.05$ ). The cycle parameters themselves  
713 were compared across channels in a similar manner. A direct comparison of the parameters  
714 does not address oscillatory “regularity” (see above) but allows to determine if two given  
715 oscillations have different shapes. For a given channel, penetration, and parameter (e.g.  
716 period), the median value of the parameter was obtained. Medians from all penetrations were  
717 pairwise compared across channels with paired statistics ( $n = 30$  penetrations; FDR-corrected  
718 Wilcoxon signed rank tests, significance when  $p_{\text{corr}} < 0.05$ ). All comparisons were performed  
719 across parameters and frequency bands.

## 720 Directionality analyses

721 Directional connectivity in the FAF-AC network was quantified with the directed phase  
722 transfer entropy (dPTE; (Hillebrand et al., 2016)), based on the phase transfer entropy (PTE)  
723 metric (Lobier et al., 2018). PTE is a data-driven, non-parametric directionality index that  
724 relates closely to transfer entropy (TE; (Wibral et al., 2014)), but is based on the phase time-  
725 series of the signals under consideration (here, FAF and AC field potentials). PTE is sensible  
726 to information flow present in broad- and narrowband signals, and is in a large degree robust  
727 to the effects of, for example, noise, linear mixing, and sample size (Lobier et al., 2018;  
728 Young et al., 2017).

729 In terms of TE, a signal X causally influences signal Y (both of them can be considered as  
730 phase times series), if the uncertainty about the future of Y can be reduced from knowing both

731 the past of signal X and signal Y, as compared to knowing the past of signal Y alone.

732 Formally, the above can be expressed as follows:

$$733 \quad TE_{xy} = \sum p(Y_{t+\delta}, Y_t, X_t) \log \left( \frac{p(Y_{t+\delta}|Y_t, X_t)}{p(Y_{t+\delta}|Y_t)} \right) \quad [4],$$

734 where  $\delta$  represents the delay of the information transfer interaction, and  $TE_{xy}$  is the transfer  
735 entropy between signals X and Y. The estimation of the probabilities for TE quantification  
736 requires large computational times and the tuning of various parameters (Hillebrand et al.,  
737 2016). PTE, on the other hand, converts the time series into a sequence of symbols (binned-  
738 phase time series, see below), and is able to estimate TE on the phase series reducing  
739 significantly both processing times and the necessity for parameter fitting (Lobier et al.,  
740 2018).

741 Phase time series were obtained after filtering the LFP signals in a specific frequency band  
742 (e.g.  $\theta$ , 4-8 Hz) and Hilbert transforming the filtered data. To avoid edge artefacts, the full  
743 ~10 minutes recordings were filtered and Hilbert transformed before chunking segments  
744 related to individual trials (i.e. pre-voc: -500-0 ms relative to call onset, post-voc: 0-250 ms  
745 relative to call onset, or no-voc baseline periods). According to the condition under  
746 consideration (sonar/non-sonar and pre-voc/post-voc, or baseline periods), we selected 50  
747 trials pseudo-randomly and then concatenated them before quantifying directional  
748 connectivity. This process was repeated 500 times and the distribution of dPTE values  
749 obtained from each repetition used for further analyses. The former resulted in a distribution  
750 of 500 dPTE connectivity matrices; the median value across these was used for constructing  
751 connectivity graphs (see below).

752 Given the phase of the LFP signals, the PTE was calculated according to equation [4].

753 However, probabilities in this case were estimated by constructing histograms of binned  
754 phases (Lobier et al., 2018) instead of using the full, continuous time series. Following (Scott  
755 et al., 1997), the number of bins in the histograms was set to:

$$756 \quad 3.49 * \mu(\sigma(\phi)) * N_s^{\frac{1}{3}} \quad [5],$$

757 where  $m$  and  $s$  represent the mean and standard deviation, respectively,  $f$  represents the phase  
758 time series, and  $N_s$  denotes the number of samples.

759 The prediction delay  $d$  was set to  $(N_s \times N_{ch}) / N_{+}$  (Hillebrand et al., 2016), where  $N_s$  and  $N_{ch}$  are  
760 the number of samples and channels ( $N_{ch} = 32$ ), respectively. The value of  $N_{+}$  corresponds to  
761 the number of times the LFP phase changes sign across all channels and times.

762 The dPTE was calculated from the PTE as follows (Hillebrand et al., 2016):

$$763 \quad dPTE_{xy} = \frac{PTE_{xy}}{PTE_{xy} + PTE_{yx}} \quad [6]$$

764 With values ranging between 0 and 1, dPTEs  $> 0.5$  indicate information flow preferentially in  
765 the  $X \rightarrow Y$  direction, dPTE values below 0.5 indicate preferential information flow in the  
766 opposite direction, and dPTE = 0.5 indicates no preferred direction of information flow. In  
767 other words, dPTE is a metric of preferred directionality between two given signals. Note that  
768 the dPTE analysis among a set of electrodes yields a directed connectivity matrix that can be  
769 considered as an adjacency matrix of a directed graph (see below). All PTE and dPTE  
770 calculations were done with the Brainstorm toolbox in MatLab (Tadel et al., 2011).

### 771 Connectivity graphs

772 A graph-theoretic examination of the connectivity patterns was made by constructing directed  
773 graphs based on the results obtained from the dPTE analyses (i.e. the median across the 500  
774 repetitions; see above). For simplicity, channels in the FAF and AC within a range of 150  $\mu\text{m}$   
775 were grouped as follows (in the FAF, as an example): FAF<sub>top</sub>, channels 1-4 (0-150  $\mu\text{m}$ );  
776 FAF<sub>mid1</sub>, channels 5-8 (200-350  $\mu\text{m}$ ); FAF<sub>mid2</sub>, channels 9-12 (400-550  $\mu\text{m}$ ); FAF<sub>bottom</sub>,  
777 channels 13-16 (600-750  $\mu\text{m}$ ). A similar grouping was done for electrodes located in AC.

778 These channel groups were considered as the nodes of a directed graph. A directed edge ( $u, v$ )  
779 between any two nodes then represents a preferential information flow from node  $u$  to node  $v$ .  
780 The weight of the edge was taken as the median dPTE for the channel groups corresponding  
781 to the nodes, according to the dPTE connectivity matrices. For instance, if the groups  
782 considered were FAF<sub>top</sub> and AC<sub>bottom</sub>, then the weight between both nodes was the median of  
783 the obtained dPTE values calculated from channels 1-4 in FAF towards channels 13-16 in  
784 AC. The weight of an edge was quantified as a directionality index (DI):

$$785 \quad DI = \frac{\text{median}(dPTE_{uv}) - 0.5}{0.5} * 100 \quad [7],$$

786 which expresses, in percentage points, the strength of the preference of information flow in a  
787 certain direction. Equation [6] is based on the fact that a dPTE of 0.5 corresponds to no  
788 preferred direction of information flow (Hillebrand et al., 2016).

789 To statistically validate the directionality shown in the graphs we used a bootstrapping  
790 approach. Surrogate adjacency matrices were built for the same channel groups (top, mid1,  
791 mid2 and bottom), but electrodes were randomly assigned to each group, independently of  
792 their depths or cortical location. This randomization was done independently within each of  
793 the 500 dPTE matrices obtained from the main connectivity analysis. Then, an adjacency  
794 matrix was obtained from these surrogate data in the same way as described above (i.e. using  
795 the median across 500 randomized dPTE matrices). Such a procedure was repeated 10,000  
796 times, yielding an equal number of surrogate graphs. An edge in the original graph was kept if  
797 the DI of that edge was at least 2.5 standard deviations higher than the mean of the surrogate  
798 distribution obtained for that edge (i.e. higher than the 99.38% of the surrogate observations).  
799 Edges that did not fulfill this criterion were labelled as non-significant and were therefore not  
800 considered for any subsequent analyses.

### 801 Statistical procedures

802 All statistical analyses were made with custom-written MatLab scripts. Paired and unpaired  
803 statistical comparisons were performed with Wilcoxon signed-rank and rank sum tests,  
804 respectively. These are appropriately indicated in the text, together with sample sizes and p-  
805 values. All statistics, unless otherwise noted, were corrected for multiple comparisons with  
806 the False Discovery Rate approach, using the Benjamini and Hochberg procedure (Benjamini  
807 and Hochberg, 1995). An alpha of 0.05 was set as threshold for statistical significance. The  
808 effect size metric used, unless stated otherwise (as in the GLM case), was Cohen's d:

$$809 \quad d = \frac{\mu_{D1} - \mu_{D2}}{\sqrt{\frac{(n_1 - 1)\sigma_{D1}^2 + (n_2 - 1)\sigma_{D2}^2}{n_1 + n_2 - 2}}} \quad [8],$$

810 where D1 and D2 are two distributions,  $\mu$  represents the mean,  $\sigma^2$  represents the variance,  
811 while  $n_1$  and  $n_2$  are the sample sizes. Effect sizes were considered small when  $|d| < 0.5$ ,  
812 medium when  $0.5 \leq |d| \leq 0.8$ , and large when  $|d| > 0.8$  (Cohen, 1988).

813 To test differences in the connectivity graphs across conditions (e.g. sonar vs. non-sonar), we  
814 obtained adjacency matrices for each of the 500 penetrations (one per dPTE connectivity  
815 matrix; see above) and compared the distributions using Wilcoxon signed rank tests. Given

816 that the large sample size ( $n = 500$  here) increases the occurrence of significant outcomes in  
817 statistical testing, edges were only shown when comparisons were significant and produced  
818 large effect sizes ( $|d| > 0.8$ ).

819 When comparing connectivity graphs between pre-voc and post-voc conditions, we used the  
820 exact same trials per repetitions to construct the distribution of dPTE matrices for the pre- and  
821 post-voc cases. A certain repetition  $m$  for each condition was then treated as paired, and  
822 therefore Wilcoxon signed rank tests were used for comparing (as opposed to unpaired  
823 statistics above). Again, only edges representing significant differences ( $p_{\text{corr}} < 0.05$ ) with  
824 large effect sizes were shown.

### 825 **Conflict of interests**

826 The authors declare no financial or non-financial conflicts of interest.

### 827 **Acknowledgments**

828 This work was supported by the DFG (Grant No. HE 7478/1-1, to JCH), and the Joachim-  
829 Herz Foundation (Fellowship granted to FGR).

830

### 831 **References**

- 832 Abbasi, O., and Gross, J. (2020). Beta-band oscillations play an essential role in motor-auditory  
833 interactions. *Hum Brain Mapp* *41*, 656-665.
- 834 Aliu, S.O., Houde, J.F., and Nagarajan, S.S. (2009). Motor-induced suppression of the auditory cortex.  
835 *J Cogn Neurosci* *21*, 791-802.
- 836 Baess, P., Horvath, J., Jacobsen, T., and Schroger, E. (2011). Selective suppression of self-initiated  
837 sounds in an auditory stream: An ERP study. *Psychophysiology* *48*, 1276-1283.
- 838 Behroozmand, R., Karvelis, L., Liu, H., and Larson, C.R. (2009). Vocalization-induced enhancement of  
839 the auditory cortex responsiveness during voice F0 feedback perturbation. *Clin Neurophysiol* *120*,  
840 1303-1312.
- 841 Behroozmand, R., Shebek, R., Hansen, D.R., Oya, H., Robin, D.A., Howard, M.A., 3rd, and Greenlee,  
842 J.D. (2015). Sensory-motor networks involved in speech production and motor control: an fMRI  
843 study. *Neuroimage* *109*, 418-428.
- 844 Benjamini, Y., and Hochberg, Y. (1995). Controlling the False Discovery Rate - a Practical and Powerful  
845 Approach to Multiple Testing. *J Roy Stat Soc B Met* *57*, 289-300.
- 846 Bokil, H., Andrews, P., Kulkarni, J.E., Mehta, S., and Mitra, P.P. (2010). Chronux: a platform for  
847 analyzing neural signals. *Journal of neuroscience methods* *192*, 146-151.

- 848 Buzsaki, G., Anastassiou, C.A., and Koch, C. (2012). The origin of extracellular fields and currents--  
849 EEG, ECoG, LFP and spikes. *Nat Rev Neurosci* *13*, 407-420.
- 850 Choi, E.Y., Drayna, G.K., and Badre, D. (2018). Evidence for a Functional Hierarchy of Association  
851 Networks. *J Cogn Neurosci* *30*, 722-736.
- 852 Clayton, K.K., Williamson, R.S., Hancock, K.E., Tasaka, G.I., Mizrahi, A., Hackett, T.A., and Polley, D.B.  
853 (2020). Auditory Corticothalamic Neurons Are Recruited by Motor Preparatory Inputs. *Curr Biol*.
- 854 Cohen, J. (1988). *Statistical power analysis for the behavioral sciences*, 2nd edn (Hillsdale, N.J.: L.  
855 Erlbaum Associates).
- 856 Cole, S., and Voytek, B. (2019). Cycle-by-cycle analysis of neural oscillations. *J Neurophysiol* *122*, 849-  
857 861.
- 858 Cole, S.R., and Voytek, B. (2017). Brain Oscillations and the Importance of Waveform Shape. *Trends*  
859 *Cogn Sci* *21*, 137-149.
- 860 Eiermann, A., and Esser, K.H. (2000). Auditory responses from the frontal cortex in the short-tailed  
861 fruit bat *Carollia perspicillata*. *Neuroreport* *11*, 421-425.
- 862 Eliades, S.J., and Tsunada, J. (2018). Auditory cortical activity drives feedback-dependent vocal  
863 control in marmosets. *Nature Communications* *9*.
- 864 Eliades, S.J., and Wang, X. (2003). Sensory-motor interaction in the primate auditory cortex during  
865 self-initiated vocalizations. *J Neurophysiol* *89*, 2194-2207.
- 866 Eliades, S.J., and Wang, X. (2005). Dynamics of auditory-vocal interaction in monkey auditory cortex.  
867 *Cereb Cortex* *15*, 1510-1523.
- 868 Eliades, S.J., and Wang, X. (2008). Neural substrates of vocalization feedback monitoring in primate  
869 auditory cortex. *Nature* *453*, 1102-1106.
- 870 Eliades, S.J., and Wang, X. (2012). Neural correlates of the lombard effect in primate auditory cortex.  
871 *J Neurosci* *32*, 10737-10748.
- 872 Eliades, S.J., and Wang, X. (2013). Comparison of auditory-vocal interactions across multiple types of  
873 vocalizations in marmoset auditory cortex. *J Neurophysiol* *109*, 1638-1657.
- 874 Esser, K.H., and Eiermann, A. (1999). Tonotopic organization and parcellation of auditory cortex in  
875 the FM-bat *Carollia perspicillata*. *Eur J Neurosci* *11*, 3669-3682.
- 876 Fenzl, T., and Schuller, G. (2007). Dissimilarities in the vocal control over communication and  
877 echolocation calls in bats. *Behav Brain Res* *182*, 173-179.
- 878 Fernandez, A.A., Fasel, N., Knörnschild, M., and Richner, H. (2014). When bats are boxing: aggressive  
879 behaviour and communication in male Seba's short-tailed fruit bat. *Anim Behav* *98*, 149-156.
- 880 Flinker, A., Chang, E.F., Kirsch, H.E., Barbaro, N.M., Crone, N.E., and Knight, R.T. (2010). Single-trial  
881 speech suppression of auditory cortex activity in humans. *J Neurosci* *30*, 16643-16650.
- 882 Ford, J.M., Roach, B.J., Faustman, W.O., and Mathalon, D.H. (2008). Out-of-synch and out-of-sorts:  
883 dysfunction of motor-sensory communication in schizophrenia. *Biol Psychiatry* *63*, 736-743.
- 884 Forseth, K.J., Hickok, G., Rollo, P.S., and Tandon, N. (2020). Language prediction mechanisms in  
885 human auditory cortex. *Nat Commun* *11*, 5240.
- 886 Fox, M.D., Corbetta, M., Snyder, A.Z., Vincent, J.L., and Raichle, M.E. (2006). Spontaneous neuronal  
887 activity distinguishes human dorsal and ventral attention systems. *Proc Natl Acad Sci U S A* *103*,  
888 10046-10051.



- 889 Franken, M.K., Eisner, F., Acheson, D.J., McQueen, J.M., Hagoort, P., and Schoffelen, J.M. (2018). Self-  
890 monitoring in the cerebral cortex: Neural responses to small pitch shifts in auditory feedback during  
891 speech production. *Neuroimage* 179, 326-336.
- 892 Fries, P. (2015). Rhythms for Cognition: Communication through Coherence. *Neuron* 88, 220-235.
- 893 García-Rosales, F., Beetz, M.J., Cabral-Calderin, Y., Kössl, M., and Hechavarria, J.C. (2018). Neuronal  
894 coding of multiscale temporal features in communication sequences within the bat auditory cortex.  
895 *Communications Biology* 1, 200.
- 896 García-Rosales, F., López-Jury, L., González-Palomares, E., Cabral-Calderin, Y., and Hechavarría, J.C.  
897 (2020). Fronto-Temporal Coupling Dynamics During Spontaneous Activity and Auditory Processing in  
898 the Bat *Carollia perspicillata*. *Frontiers in Systems Neuroscience* 14.
- 899 Garcia-Rosales, F., Lopez-Jury, L., Gonzalez-Palomares, E., Cabral-Calderin, Y., Kossel, M., and  
900 Hechavarria, J.C. (2020). Phase-amplitude coupling profiles differ in frontal and auditory cortices of  
901 bats. *Eur J Neurosci*.
- 902 Garcia-Rosales, F., Rohrig, D., Weineck, K., Rohm, M., Lin, Y.H., Cabral-Calderin, Y., Kossel, M., and  
903 Hechavarria, J.C. (2019). Laminar specificity of oscillatory coherence in the auditory cortex. *Brain*  
904 *Struct Funct* 224, 2907-2924.
- 905 Gavrilov, N., Hage, S.R., and Nieder, A. (2017). Functional Specialization of the Primate Frontal Lobe  
906 during Cognitive Control of Vocalizations. *Cell Rep* 21, 2393-2406.
- 907 Gilmartin, M.R., Balderston, N.L., and Helmstetter, F.J. (2014). Prefrontal cortical regulation of fear  
908 learning. *Trends Neurosci* 37, 455-464.
- 909 Giraud, A.L., and Poeppel, D. (2012). Cortical oscillations and speech processing: emerging  
910 computational principles and operations. *Nat Neurosci* 15, 511-517.
- 911 Gooler, D.M., and O'Neill, W.E. (1987). Topographic representation of vocal frequency demonstrated  
912 by microstimulation of anterior cingulate cortex in the echolocating bat, *Pteronotus parnelli parnelli*.  
913 *J Comp Physiol A* 161, 283-294.
- 914 Gross, J., Hoogenboom, N., Thut, G., Schyns, P., Panzeri, S., Belin, P., and Garrod, S. (2013). Speech  
915 rhythms and multiplexed oscillatory sensory coding in the human brain. *PLoS Biol* 11, e1001752.
- 916 Hage, S.R., and Nieder, A. (2013). Single neurons in monkey prefrontal cortex encode volitional  
917 initiation of vocalizations. *Nat Commun* 4, 2409.
- 918 Hechavarria, J.C., Beetz, M.J., Macias, S., and Kössl, M. (2016). Distress vocalization sequences  
919 broadcasted by bats carry redundant information. *J Comp Physiol A Neuroethol Sens Neural Behav*  
920 *Physiol* 202, 503-515.
- 921 Helfrich, R.F., and Knight, R.T. (2016). Oscillatory Dynamics of Prefrontal Cognitive Control. *Trends*  
922 *Cogn Sci* 20, 916-930.
- 923 Helfrich, R.F., and Knight, R.T. (2019). Cognitive neurophysiology of the prefrontal cortex. *Handb Clin*  
924 *Neurol* 163, 35-59.
- 925 Hillebrand, A., Tewarie, P., van Dellen, E., Yu, M., Carbo, E.W., Douw, L., Gouw, A.A., van Straaten,  
926 E.C., and Stam, C.J. (2016). Direction of information flow in large-scale resting-state networks is  
927 frequency-dependent. *Proc Natl Acad Sci U S A* 113, 3867-3872.
- 928 Jurgens, U. (2009). The neural control of vocalization in mammals: a review. *J Voice* 23, 1-10.
- 929 Kayser, C., Montemurro, M.A., Logothetis, N.K., and Panzeri, S. (2009). Spike-phase coding boosts  
930 and stabilizes information carried by spatial and temporal spike patterns. *Neuron* 61, 597-608.

- 931 Kingyon, J., Behroozmand, R., Kelley, R., Oya, H., Kawasaki, H., Narayanan, N.S., and Greenlee, J.D.  
932 (2015). High-gamma band fronto-temporal coherence as a measure of functional connectivity in  
933 speech motor control. *Neuroscience* 305, 15-25.
- 934 Knornschild, M., Feifel, M., and Kalko, E.K.V. (2013). Mother-offspring recognition in the bat *Carollia*  
935 *perspicillata*. *Anim Behav* 86, 941-948.
- 936 Knornschild, M., Feifel, M., and Kalko, E.K.V. (2014). Male courtship displays and vocal  
937 communication in the polygynous bat *Carollia perspicillata*. *Behaviour* 151, 781-798.
- 938 Knörschild, M., Feifel, M., and Kalko, E.K.V. (2014). Male courtship displays and vocal  
939 communication in the polygynous bat *Carollia perspicillata*. *Behaviour* 151, 781-798.
- 940 Kobler, J.B., Isbey, S.F., and Casseday, J.H. (1987). Auditory pathways to the frontal cortex of the  
941 mustache bat, *Pteronotus parnellii*. *Science* 236, 824-826.
- 942 Lakatos, P., Chen, C.M., O'Connell, M.N., Mills, A., and Schroeder, C.E. (2007). Neuronal oscillations  
943 and multisensory interaction in primary auditory cortex. *Neuron* 53, 279-292.
- 944 Lakatos, P., Karmos, G., Mehta, A.D., Ulbert, I., and Schroeder, C.E. (2008). Entrainment of neuronal  
945 oscillations as a mechanism of attentional selection. *Science* 320, 110-113.
- 946 Lakatos, P., Musacchia, G., O'Connell, M.N., Falchier, A.Y., Javitt, D.C., and Schroeder, C.E. (2013). The  
947 Spectrotemporal Filter Mechanism of Auditory Selective Attention. *Neuron* 77, 750-761.
- 948 Lakatos, P., Shah, A.S., Knuth, K.H., Ulbert, I., Karmos, G., and Schroeder, C.E. (2005). An oscillatory  
949 hierarchy controlling neuronal excitability and stimulus processing in the auditory cortex. *J*  
950 *Neurophysiol* 94, 1904-1911.
- 951 Li, S., Zhu, H., and Tian, X. (2020). Corollary Discharge Versus Efference Copy: Distinct Neural Signals  
952 in Speech Preparation Differentially Modulate Auditory Responses. *Cereb Cortex* 30, 5806-5820.
- 953 Lobier, M., Palva, J.M., and Palva, S. (2018). High-alpha band synchronization across frontal, parietal  
954 and visual cortex mediates behavioral and neuronal effects of visuospatial attention. *Neuroimage*  
955 165, 222-237.
- 956 Lobier, M., Siebenhuhner, F., Palva, S., and Palva, J.M. (2014). Phase transfer entropy: a novel phase-  
957 based measure for directed connectivity in networks coupled by oscillatory interactions. *Neuroimage*  
958 85 Pt 2, 853-872.
- 959 Loh, K.K., Procyk, E., Neveu, R., Lambertson, F., Hopkins, W.D., Petrides, M., and Amiez, C. (2020).  
960 Cognitive control of orofacial motor and vocal responses in the ventrolateral and dorsomedial human  
961 frontal cortex. *Proc Natl Acad Sci U S A* 117, 4994-5005.
- 962 Martikainen, M.H., Kaneko, K., and Hari, R. (2005). Suppressed responses to self-triggered sounds in  
963 the human auditory cortex. *Cereb Cortex* 15, 299-302.
- 964 Nakagawa, S., and Schielzeth, H. (2013). A general and simple method for obtaining R<sup>2</sup> from  
965 generalized linear mixed-effects models. *Methods Ecol Evol* 4, 133-142.
- 966 Nelson, A., Schneider, D.M., Takatoh, J., Sakurai, K., Wang, F., and Mooney, R. (2013). A circuit for  
967 motor cortical modulation of auditory cortical activity. *J Neurosci* 33, 14342-14353.
- 968 O'Connell, M.N., Barczak, A., Ross, D., McGinnis, T., Schroeder, C.E., and Lakatos, P. (2015). Multi-  
969 Scale Entrainment of Coupled Neuronal Oscillations in Primary Auditory Cortex. *Front Hum Neurosci*  
970 9, 655.
- 971 Okobi, D.E., Jr., Banerjee, A., Matheson, A.M.M., Phelps, S.M., and Long, M.A. (2019). Motor cortical  
972 control of vocal interaction in neotropical singing mice. *Science* 363, 983-988.

- 973 Park, H., Ince, R.A., Schyns, P.G., Thut, G., and Gross, J. (2015). Frontal top-down signals increase  
974 coupling of auditory low-frequency oscillations to continuous speech in human listeners. *Curr Biol* 25,  
975 1649-1653.
- 976 Petkov, C.I., and Jarvis, E.D. (2012). Birds, primates, and spoken language origins: behavioral  
977 phenotypes and neurobiological substrates. *Front Evol Neurosci* 4, 12.
- 978 Pezze, M., McGarrity, S., Mason, R., Fone, K.C., and Bast, T. (2014). Too little and too much:  
979 hypoactivation and disinhibition of medial prefrontal cortex cause attentional deficits. *J Neurosci* 34,  
980 7931-7946.
- 981 Pittman-Polletta, B., Wang, Y., Stanley, D.A., Schroeder, C., Whittington, M., and Kopell, N. (2020).  
982 Differential contributions of synaptic and intrinsic inhibitory currents to speech segmentation via  
983 flexible phase-locking in neural oscillators. *bioRxiv*.
- 984 Plakke, B., and Romanski, L.M. (2014). Auditory connections and functions of prefrontal cortex. *Front*  
985 *Neurosci-Switz* 8.
- 986 Roy, S., Zhao, L., and Wang, X. (2016). Distinct Neural Activities in Premotor Cortex during Natural  
987 Vocal Behaviors in a New World Primate, the Common Marmoset (*Callithrix jacchus*). *J Neurosci* 36,  
988 12168-12179.
- 989 Rummell, B.P., Klee, J.L., and Sigurdsson, T. (2016). Attenuation of Responses to Self-Generated  
990 Sounds in Auditory Cortical Neurons. *J Neurosci* 36, 12010-12026.
- 991 Sang, N., Zhang, L., Hao, L., Wang, Y., Wang, X., Zhang, F., Huang, H., Hou, X., Mao, Y., Bi, T., *et al.*  
992 (2017). Human sensory cortex structure and top-down controlling brain network determine  
993 individual differences in perceptual alternations. *Neurosci Lett* 636, 113-119.
- 994 Schmitt, L.M., Wang, J., Pedapati, E.V., Thurman, A.J., Abbeduto, L., Erickson, C.A., and Sweeney, J.A.  
995 (2020). A neurophysiological model of speech production deficits in fragile X syndrome. *Brain*  
996 *Commun* 2.
- 997 Schulz, G.M., Varga, M., Jeffries, K., Ludlow, C.L., and Braun, A.R. (2005). Functional neuroanatomy of  
998 human vocalization: an H215O PET study. *Cereb Cortex* 15, 1835-1847.
- 999 Scott, S.K., Young, A.W., Calder, A.J., Hellawell, D.J., Aggleton, J.P., and Johnson, M. (1997). Impaired  
1000 auditory recognition of fear and anger following bilateral amygdala lesions. *Nature* 385, 254-257.
- 1001 Simmons, J.A. (2012). Bats use a neuronally implemented computational acoustic model to form  
1002 sonar images. *Curr Opin Neurobiol* 22, 311-319.
- 1003 Simonyan, K., and Jurgens, U. (2003). Efferent subcortical projections of the laryngeal motorcortex in  
1004 the rhesus monkey. *Brain Res* 974, 43-59.
- 1005 Tadel, F., Baillet, S., Mosher, J.C., Pantazis, D., and Leahy, R.M. (2011). Brainstorm: a user-friendly  
1006 application for MEG/EEG analysis. *Comput Intell Neurosci* 2011, 879716.
- 1007 Toyomura, A., Koyama, S., Miyamaoto, T., Terao, A., Omori, T., Murohashi, H., and Kuriki, S. (2007).  
1008 Neural correlates of auditory feedback control in human. *Neuroscience* 146, 499-503.
- 1009 Tschida, K., Michael, V., Takatoh, J., Han, B.X., Zhao, S., Sakurai, K., Mooney, R., and Wang, F. (2019).  
1010 A Specialized Neural Circuit Gates Social Vocalizations in the Mouse. *Neuron* 103, 459-472 e454.
- 1011 Tsunada, J., and Eliades, S.J. (2020). Dissociation of Unit Activity and Gamma Oscillations during  
1012 Vocalization in Primate Auditory Cortex. *J Neurosci* 40, 4158-4171.
- 1013 Voorn, P., Vanderschuren, L.J., Groenewegen, H.J., Robbins, T.W., and Pennartz, C.M. (2004). Putting  
1014 a spin on the dorsal-ventral divide of the striatum. *Trends Neurosci* 27, 468-474.

- 1015 Weineck, K., Garcia-Rosales, F., and Hechavarria, J.C. (2020). Neural oscillations in the fronto-striatal  
1016 network predict vocal output in bats. *PLoS Biol* 18, e3000658.
- 1017 Wibrál, M., Vicente, R., and Lindner, M. (2014). Transfer Entropy in Neuroscience. In *Directed*  
1018 *Information Measures in Neuroscience*, M. Wibrál, R. Vicente, and J.T. Lizier, eds. (Berlin, Heidelberg:  
1019 Springer Berlin Heidelberg), pp. 3-36.
- 1020 Winkowski, D.E., Bandyopadhyay, S., Shamma, S.A., and Kanold, P.O. (2013). Frontal cortex activation  
1021 causes rapid plasticity of auditory cortical processing. *J Neurosci* 33, 18134-18148.
- 1022 Winkowski, D.E., Nagode, D.A., Donaldson, K.J., Yin, P., Shamma, S.A., Fritz, J.B., and Kanold, P.O.  
1023 (2018). Orbitofrontal Cortex Neurons Respond to Sound and Activate Primary Auditory Cortex  
1024 Neurons. *Cereb Cortex* 28, 868-879.
- 1025 Young, C.K., Ruan, M., and McNaughton, N. (2017). A Critical Assessment of Directed Connectivity  
1026 Estimates with Artificially Imposed Causality in the Supramammillary-Septo-Hippocampal Circuit.  
1027 *Front Syst Neurosci* 11, 72.
- 1028 Zempeltzi, M.M., Kisse, M., Brunk, M.G.K., Glemser, C., Aksit, S., Deane, K.E., Maurya, S., Schneider,  
1029 L., Ohl, F.W., Deliano, M., *et al.* (2020). Task rule and choice are reflected by layer-specific processing  
1030 in rodent auditory cortical microcircuits. *Commun Biol* 3, 345.
- 1031 Zhang, S., Xu, M., Chang, W.C., Ma, C., Hoang Do, J.P., Jeong, D., Lei, T., Fan, J.L., and Dan, Y. (2016).  
1032 Organization of long-range inputs and outputs of frontal cortex for top-down control. *Nat Neurosci*  
1033 19, 1733-1742.
- 1034 Zhang, W., and Yartsev, M.M. (2019). Correlated Neural Activity across the Brains of Socially  
1035 Interacting Bats. *Cell* 178, 413-428 e422.
- 1036 Zhang, Y.S., and Ghazanfar, A.A. (2020). A Hierarchy of Autonomous Systems for Vocal Production.  
1037 *Trends Neurosci* 43, 115-126.

1038

1039

## 1040 **Figure legends**

1041 **Fig. 1. Pre-vocal oscillations in frontal and auditory cortices allow to predict ensuing**  
1042 **vocal output.** (a) Oscillograms (top) and spectrogram (bottoms) of exemplary sonar (left)  
1043 and non-sonar calls produced by *C. perspicillata*. (b) Distribution of sonar (blue, n = 147)  
1044 and non-sonar (orange, n = 725) call lengths. No significance differences were observed  
1045 (Wilcoxon rank sum test, p = 0.12). (c) (Left) Normalized average power spectral density  
1046 (PSD) of sonar (blue) and non-sonar (orange) calls. (Right) Distribution of peak  
1047 frequencies of sonar and non-sonar utterances. There were significance differences in the  
1048 peak frequencies of sonar and non-sonar vocalizations (p = 4.48x10<sup>-69</sup>). (d) Single-trial  
1049 LFPs recorded simultaneous to sonar and non-sonar utterances (left and right columns,  
1050 respectively). The vertical red dashed line, at time 0, indicates the moment of vocalization  
1051 onset. The top 16 traces correspond to LFPs recorded in the FAF; the bottom 16 LFP traces  
1052 were recorded from the AC (demarcated in the panel). FAF and AC recordings were made  
1053 simultaneously. (e) Average pre-vocal (-500 to 0 ms, relative to call onset) power spectral  
1054 densities (PSD) at a representative depth (300 μm) in FAF and AC. Blue: sonar calls;  
1055 orange: non-sonar calls; black, dashed: no-voc periods. The difference between sonar and

1056 non-sonar PSDs is depicted in grey (right). (e) Percentage pre-vocal power change across  
1057 representative LFP bands ( $\delta$ , 1-4 Hz;  $\beta_1$ , 12-20 Hz;  $\gamma_2$ , 60-120 Hz), relative to a no-voc  
1058 baseline, across cortical depths in FAF (top) and AC (bottom). Values related to sonar  
1059 utterances ( $n = 147$ ) are depicted in blue; those related to non-sonar utterances ( $n = 725$ )  
1060 are depicted in orange. Data shown as mean  $\pm$  sem. (f) Pre-vocal power change in frontal  
1061 and auditory regions are predictors of vocalization type. Effect size ( $R^2_m$ ) of GLMs  
1062 considering all frequency bands and channels, both in frontal and auditory cortices. Effect  
1063 sizes were considered small when  $R^2_m < 0.1$ , and medium for  $R^2_m \geq 0.1$ . For illustrative  
1064 purposes, effect size values from non-significant models were set to 0.

1065 **Fig. 2. Cycle- parameter regularity differs between frontal and auditory cortices.** (a)  
1066 Simultaneously recorded, 30s long raw LFP traces (grey) from FAF and AC at depths of  
1067 700  $\mu\text{m}$ , in which detected oscillatory bursts in  $\delta$  and  $\gamma_2$  bands are marked in black and  
1068 magenta, respectively. (b) Average  $\delta$  and  $\gamma_2$  bursts from frontal and auditory cortices ( $n =$   
1069 50 bursts). (c) Schematic representation of cycle parameters used to characterize oscillatory  
1070 morphology. (d) Representative distribution of cycle parameter “period” for  $\delta$  LFPs in  
1071 simultaneously recorded FAF (blue) and AC (orange) channels (same penetration in a).  
1072 Fano factor in FAF: 9.77; Fano factor in AC: 22.60. (e) Schematic representation  
1073 illustrating the association between region and cortical depth with the channel number  
1074 identifier of panel f. (f) Effect sizes (Cohen’s  $d$ ) of the channel-by-channel pairwise  
1075 comparisons between cycle parameters, across penetrations and frequency bands ( $\delta$ ,  $\theta$ ,  $\alpha$ ,  
1076  $\beta_1$ ,  $\gamma_2$ ). In each plot, a pixel with index  $(i, j)$  depicts the  $d$  obtained from comparing  
1077 channels  $i$  and  $j$  (solid black lines in the plots divide channels from frontal and auditory  
1078 regions).  $d$  values are only shown if the statistical comparisons are significant (FDR-  
1079 corrected Wilcoxon signed rank tests,  $p_{\text{corr}} < 0.05$ ); the value was set to 0 otherwise ( $p_{\text{corr}}$   
1080  $\geq 0.05$ ). Note that if the pixel with indices  $i, j$  is coloured blue, then channel with index  $i$   
1081 had a significantly tighter distribution (lower Fano factor) than the channel with index  $j$ .  
1082 Large effect sizes occur for  $|d| > 0.8$  (notably, blue and red regions in the plots).

1083 **Fig. 3. Directed connectivity patterns in the FAF-AC network.** (a) Graph visualization of  
1084 directed connectivity in the FAF network during no-voc periods. FAF and AC channels  
1085 were condensed into four categories: top (0-150  $\mu\text{m}$ ), mid1 (200-350  $\mu\text{m}$ ), mid2 (400-550  
1086  $\mu\text{m}$ ), and bottom (600-750  $\mu\text{m}$ ). Graph edges are weighted according to the strength of the  
1087 preferred directionality (FAF->AC in blue; AC->FAF in orange; within area directionality  
1088 in grey). Edges are only shown if there was significant preferred directionality according to  
1089 a threshold defined by bootstrapping. (b) Similar to a, but directed connectivity was  
1090 calculated in the pre-vocal sonar and non-sonar conditions. (c) Same as b, with  
1091 connectivity patterns obtained for post-vocal sonar and non-sonar conditions.

1092 **Fig. 4. Pre-vocal dPTE differences across vocalization conditions.** (a) (Top) Graphs  
1093 illustrating the differences in pre-vocal directionality between vocalization conditions  
1094 (sonar vs. non-sonar), across frequency bands. Edges were shown if three conditions were  
1095 met: (i) the differences were significant (FDR-corrected Wilcoxon rank sum tests,  $p_{\text{corr}} <$   
1096 0.05), (ii) the effect size was large ( $|d| > 0.8$ ), and (iii) edges had already shown significant  
1097 directionality (see edges in Fig. 3). Edge thickness is weighted according to the effect size



1098 of the comparison. Continuous lines indicate dPTEs for sonar (first condition) higher than  
1099 dPTEs for non-sonar (second condition) call production. Dashed lines indicate the  
1100 opposite. (*Bottom*) Net information outflow ( $DI_{\text{net}}$ ) from FAF (blue bars) and AC (orange  
1101 bars), in the two conditions considered (sonar vs. non-sonar vocal production). Significant  
1102 differences across conditions are marked with stars (FDR-corrected Wilcoxon signed-rank  
1103 tests; \*  $p_{\text{corr}} < 0.05$ , \*\*  $p_{\text{corr}} < 0.01$ , \*\*\*  $p_{\text{corr}} < 0.001$ , n.s.: not significant;  $n = 500$ ). Grey  
1104 numbers in the panels indicate effect sizes ( $d$ ; not shown for non-significant differences).  
1105 Here, values are considered independently of whether there was previous significant  
1106 directionality in any of the two conditions. Data shown as mean  $\pm$  sem. (**b**) Same as in **a**,  
1107 but comparing between sonar vs. no-voc conditions. (**c**) Same as in **a** and **b**, but comparing  
1108 between non-sonar and no-voc conditions.

1109 **Fig. 5. Post-vocal dPTE differences across vocalization conditions.** (**a**) (*Top*) Graphs  
1110 illustrating the differences in post-vocal directionality between vocalization conditions  
1111 (sonar vs. non-sonar), across frequency bands. Edges were shown if three conditions were  
1112 met: (i) the differences were significant (FDR-corrected Wilcoxon rank sum tests,  $p_{\text{corr}} <$   
1113  $0.05$ ), (ii) the effect size was large ( $|d| > 0.8$ ), and (iii) edges had already shown significant  
1114 directionality (see edges in **Fig. 3**). Edge thickness is weighted according to the effect size  
1115 of the comparison. Continuous lines indicate dPTEs for sonar (first condition) higher than  
1116 dPTEs for non-sonar (second condition) call production. Dashed lines indicate the  
1117 opposite. (*Bottom*) Net information outflow ( $DI_{\text{net}}$ ) from FAF (blue bars) and AC (orange  
1118 bars), in the two conditions considered (sonar vs. non-sonar vocal production). Significant  
1119 differences across conditions are marked with stars (FDR-corrected Wilcoxon signed-rank  
1120 tests; \*  $p_{\text{corr}} < 0.05$ , \*\*  $p_{\text{corr}} < 0.01$ , \*\*\*  $p_{\text{corr}} < 0.001$ , n.s.: not significant;  $n = 500$ ). Grey  
1121 numbers in the panels indicate effect sizes ( $d$ ; not shown for non-significant differences).  
1122 Here, values are considered independently of whether there was previous significant  
1123 directionality in any of the two conditions. Data shown as mean  $\pm$  sem. (**b**) Same as in **a**,  
1124 but comparing between sonar vs. no-voc conditions. (**c**) Same as in **a** and **b**, but comparing  
1125 between non-sonar and no-voc conditions.

1126 **Fig. 6. Pre-vocal and post-vocal directionality differences in the FAF-AC network.** (**a**)  
1127 (*Top*) Graphs illustrating the differences between pre-vocal and post-vocal directionality,  
1128 across frequency bands and during the production of sonar calls. Edges were shown if two  
1129 conditions were met: (i) the differences were significant (FDR-corrected Wilcoxon rank  
1130 sum tests,  $p_{\text{corr}} < 0.05$ ), (ii) the effect size was large ( $|d| > 0.8$ ), and (iii) edges had already  
1131 shown significant directionality (see edges in **Fig. 3**). Edge thickness is weighted according  
1132 to the effect size of the comparison. Continuous lines indicate pre-vocal dPTEs (first  
1133 condition) higher than post-vocal dPTEs. Dashed lines indicate the opposite. (*Bottom*) Net  
1134 information outflow ( $DI_{\text{net}}$ ) from FAF (blue bars) and AC (orange bars), in the two  
1135 conditions considered (pre-vocal vs. post-vocal). Significant differences between  
1136 conditions are marked with stars (FDR-corrected Wilcoxon signed-rank tests; \*  $p_{\text{corr}} <$   
1137  $0.05$ , \*\*  $p_{\text{corr}} < 0.01$ , \*\*\*  $p_{\text{corr}} < 0.001$ , n.s.: not significant;  $n = 500$ ). Grey numbers in the  
1138 panels indicate effect sizes ( $d$ ; not shown for non-significant differences). Here, values are  
1139 considered independently of whether there was previous significant directionality in any of  
1140 the two conditions. Data shown as mean  $\pm$  sem. (**b**) Same as in **a**, but illustrating

1141 comparisons of directionality between pre-vocal vs. post-vocal conditions related to the  
1142 vocalization of non-sonar calls.

1143 **Fig. 7. The FAF-AC network during vocal production.** (a) A schematic of *C.*  
1144 *perspicillata*'s brain, illustrating the location of the FAF (blue) and the AC (orange). LFPs  
1145 in these two structures differ in their cycle morphology and, remarkably, in their cycle  
1146 parameter regularity. Oscillations in frontal and auditory cortices provide a neural correlate  
1147 vocal production, allowing the prediction of ensuing call type. Prediction is possible in  
1148 complementary frequency bands in each region, and with opposite effects. (b) Schematic  
1149 representation of causal interactions (within a TE framework) in the FAF-AC network.  
1150 Strong top-down control, mostly in  $\delta$  and  $\gamma$  frequencies, occurs during spontaneous activity  
1151 (no-voc) and prior to vocal utterance. In the  $\delta$ -band, information flows top-down in the  
1152 circuit (FAF  $\rightarrow$  AC) during pre-vocal periods, but changes to bottom-up (AC  $\rightarrow$  FAF)  
1153 information transfer during post-vocal periods. The directionality patterns and the strength  
1154 of preferential causal interactions depend on the type of call produced, and on the timing  
1155 relative to vocal onset.

1156



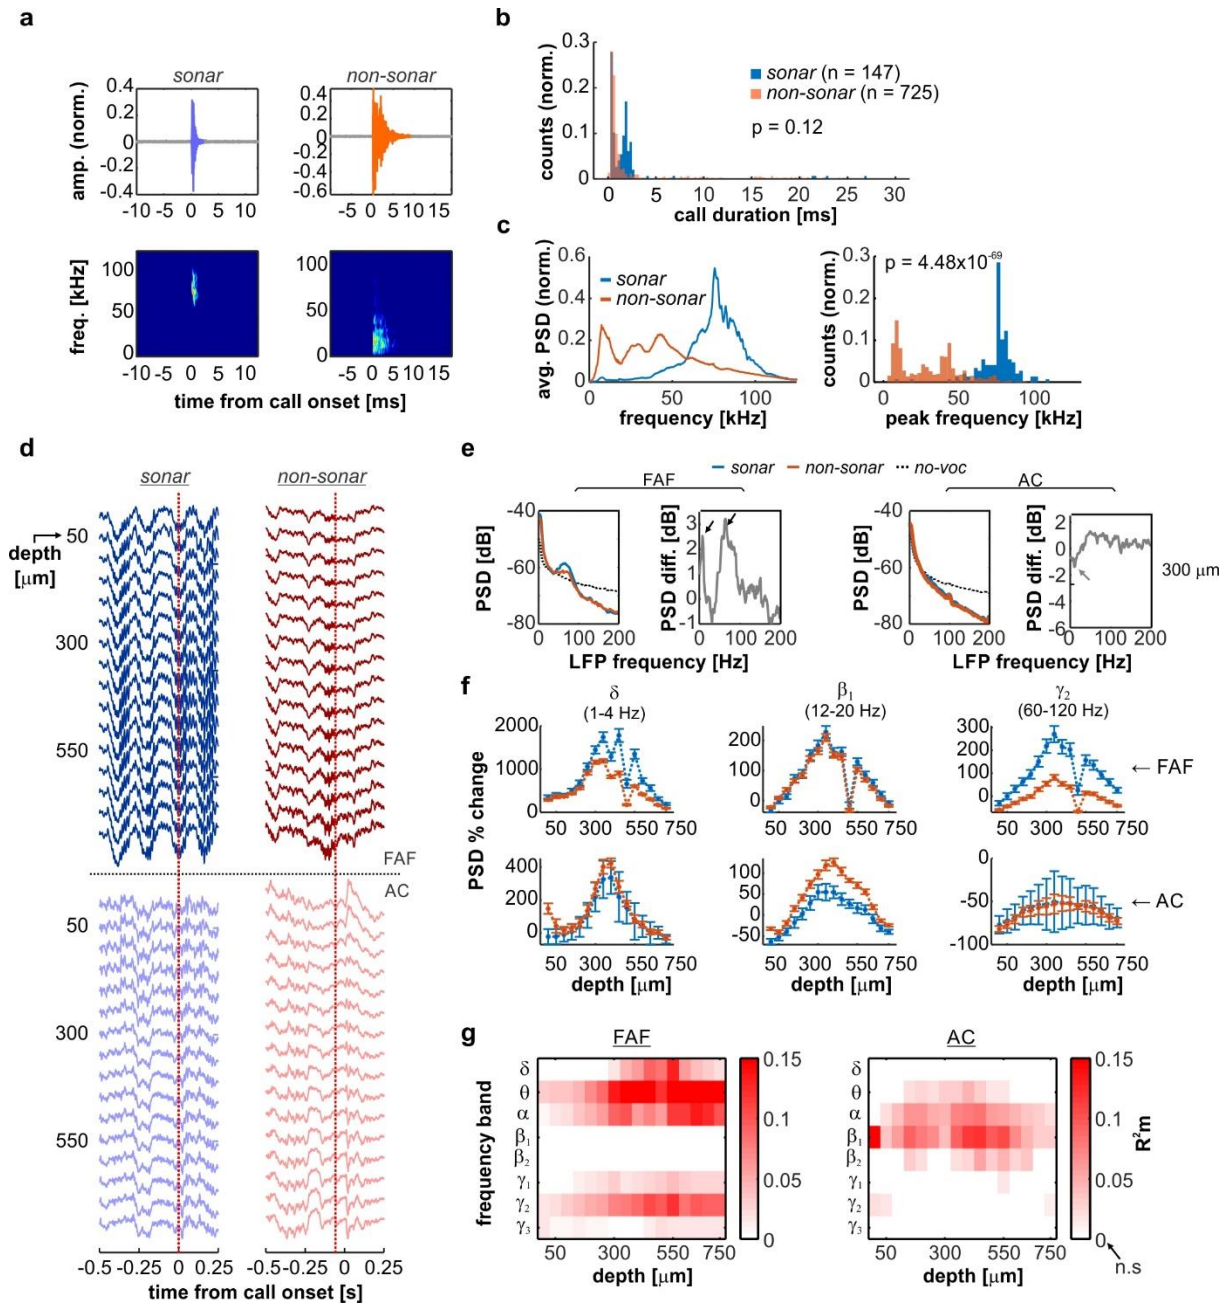

1157

1158 **Fig. 1. Pre-vocal oscillations in frontal and auditory cortices allow to predict ensuing**  
 1159 **vocal output.**

1160

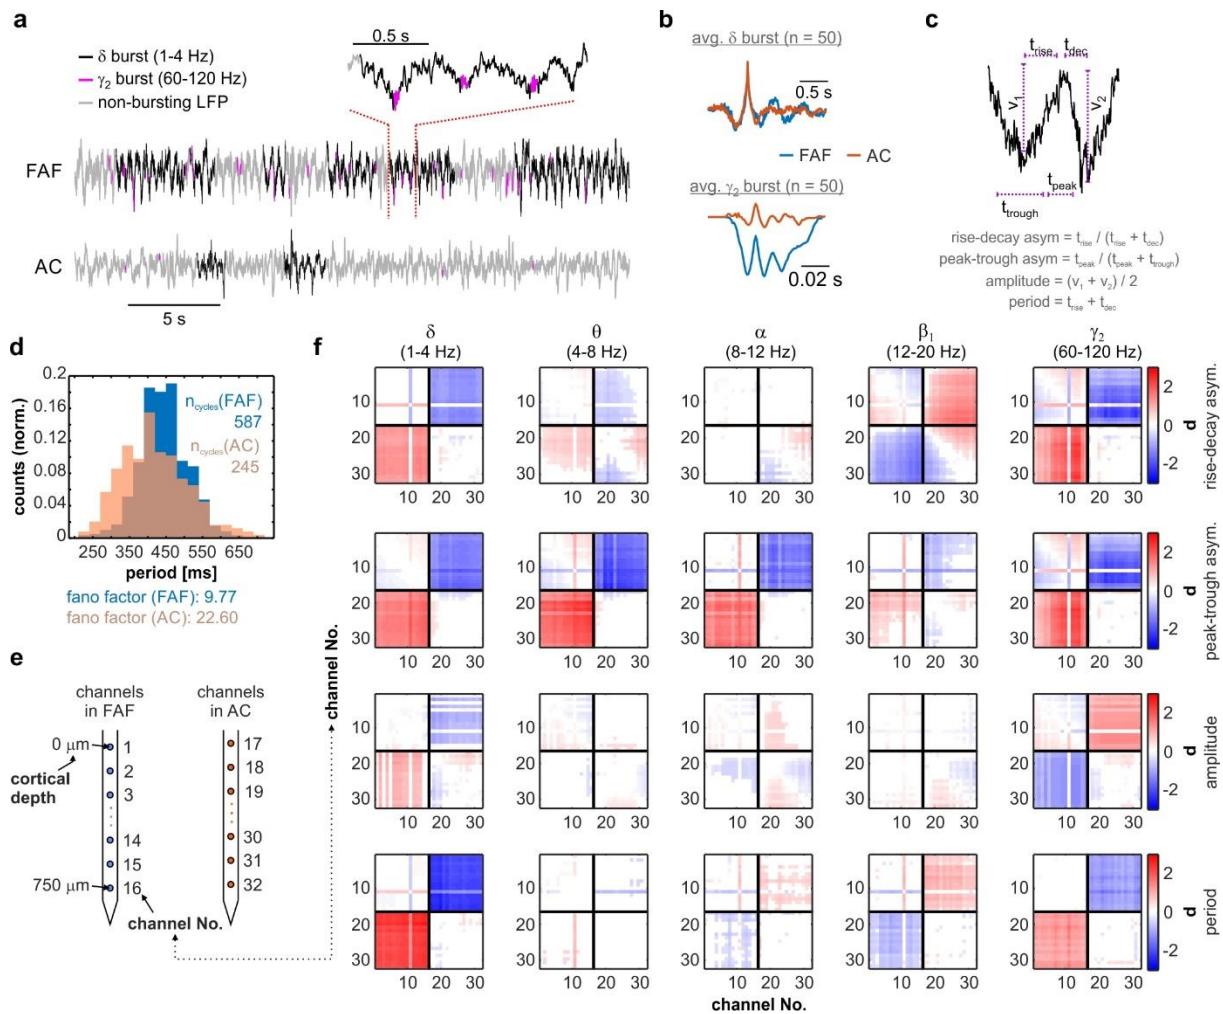

1161

1162 **Fig. 2. Cycle- parameter regularity differs between frontal and auditory cortices.**

1163

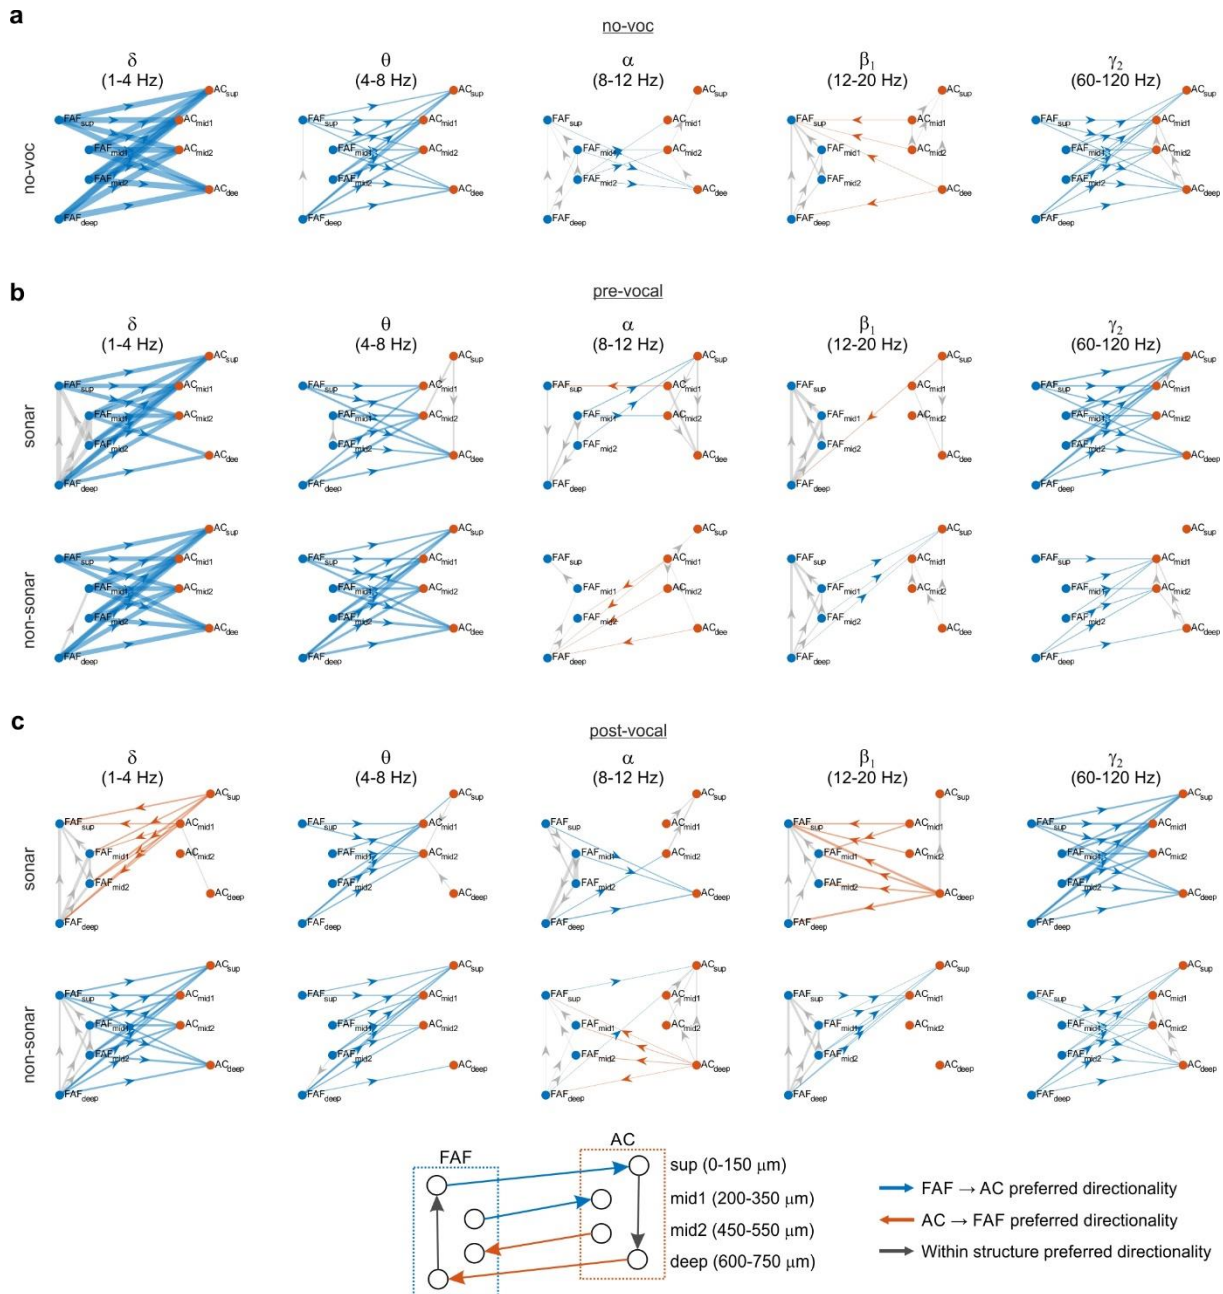

1164

1165 **Fig. 3. Directed connectivity patterns in the FAF-AC network.**

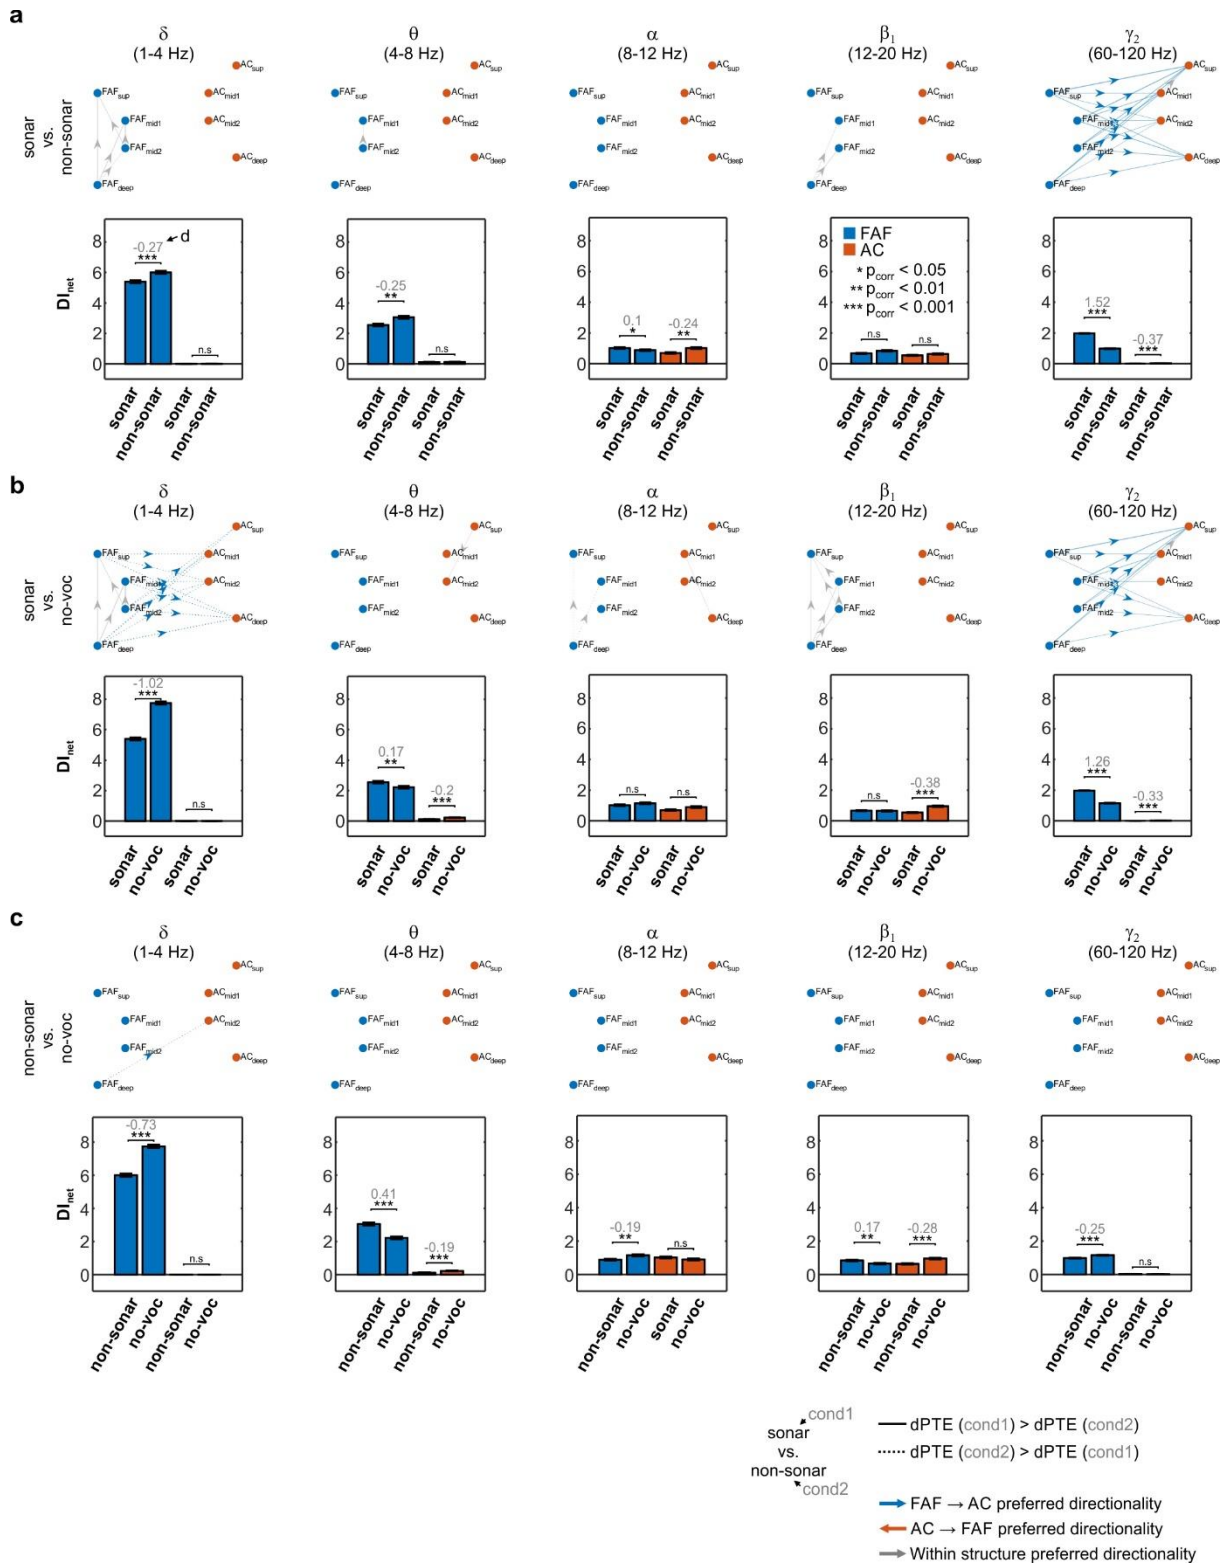

1166

1167 **Fig. 4. Pre-vocal dPTE differences across vocalization conditions.**



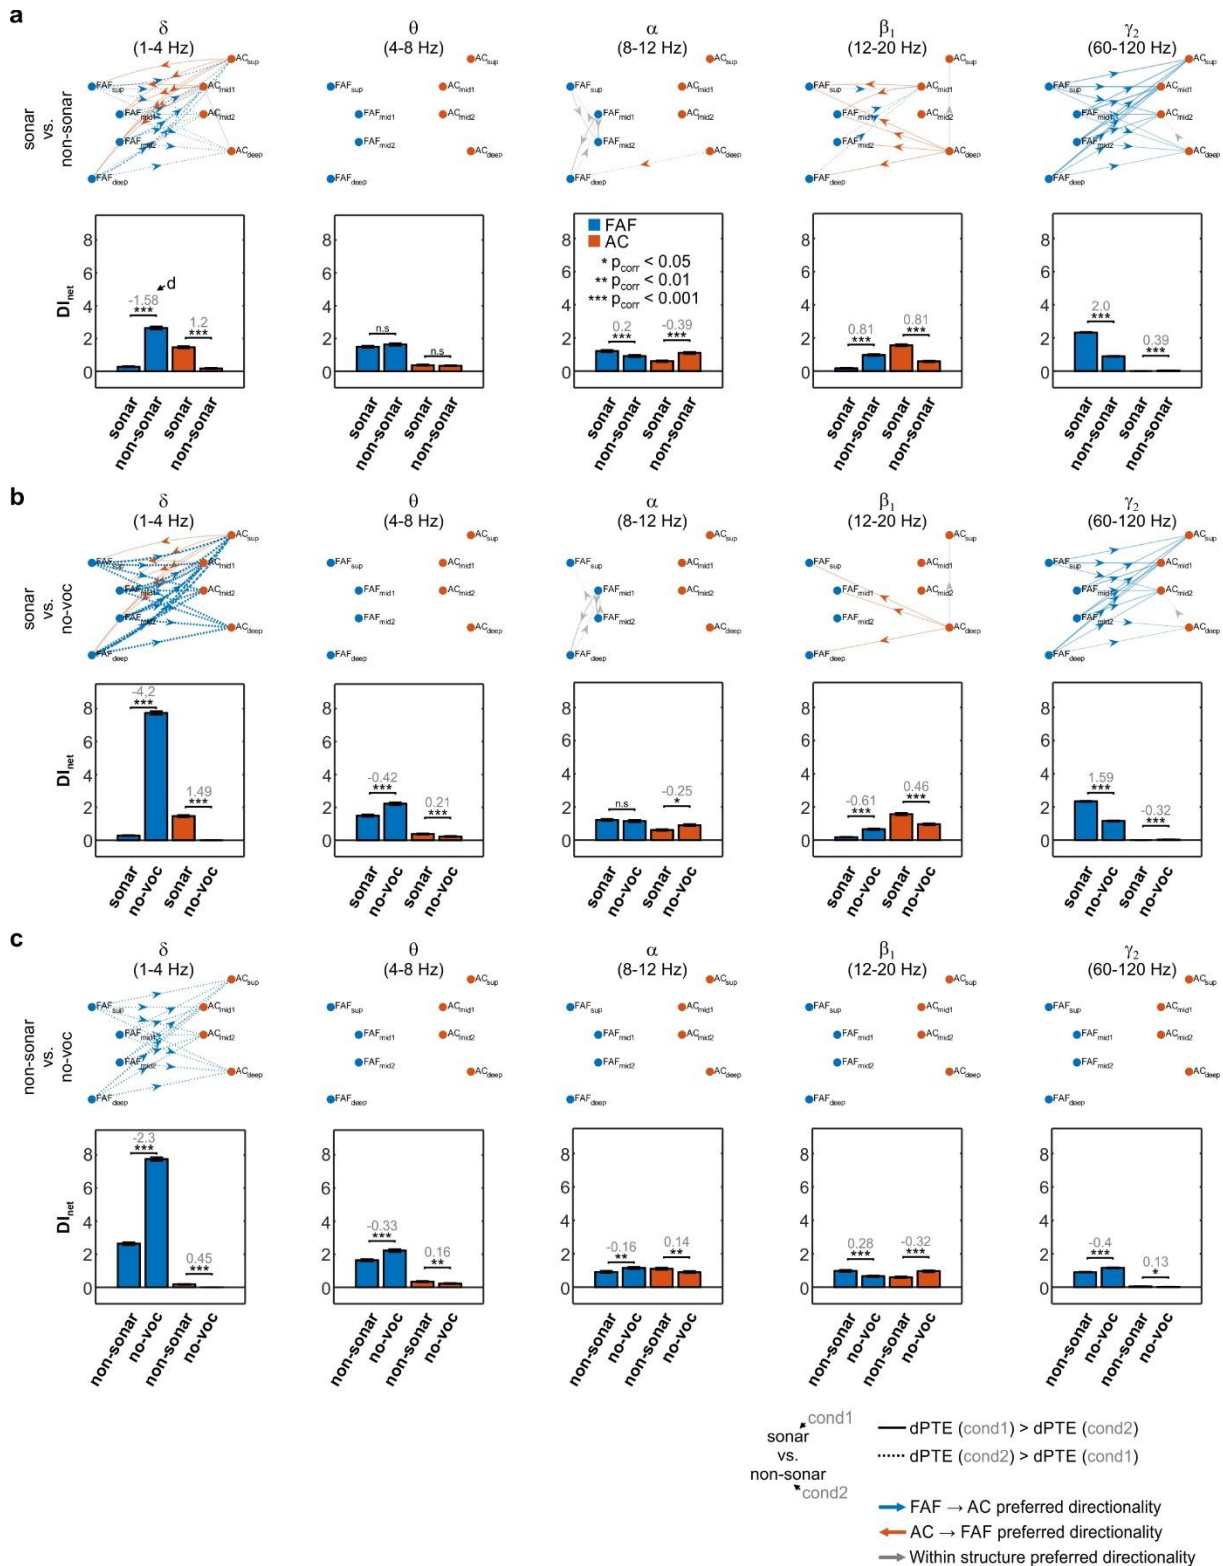

1168

1169 **Fig. 5. Post-vocal dPTE differences across vocalization conditions.**

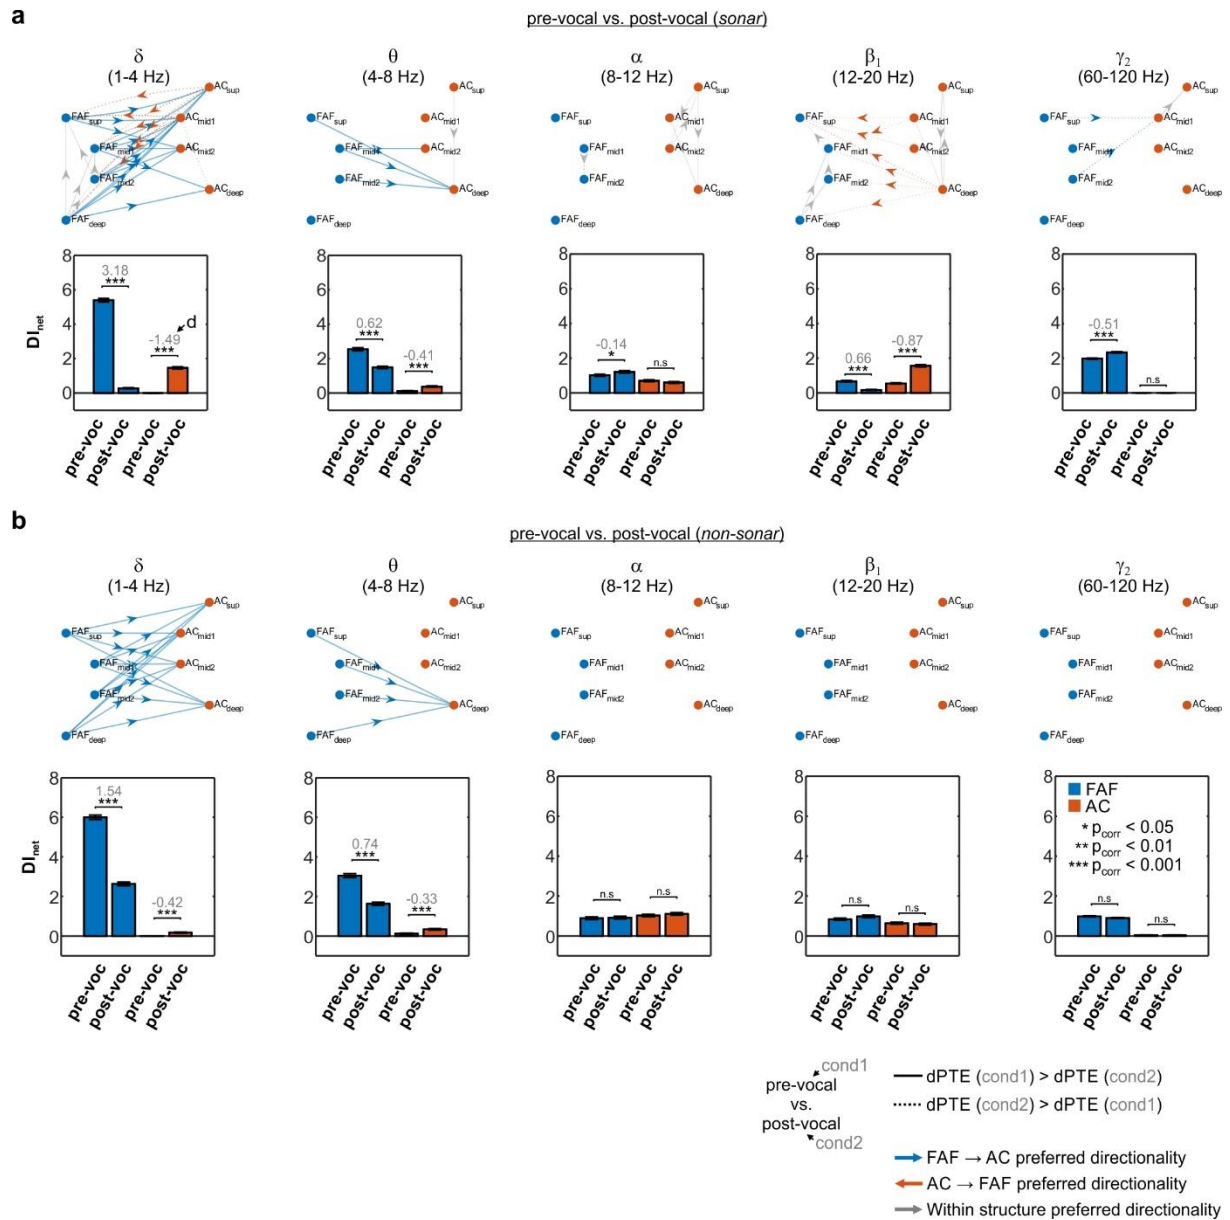

1170

1171 **Fig. 6. Pre-vocal and post-vocal directionality differences in the FAF-AC network.**

1172



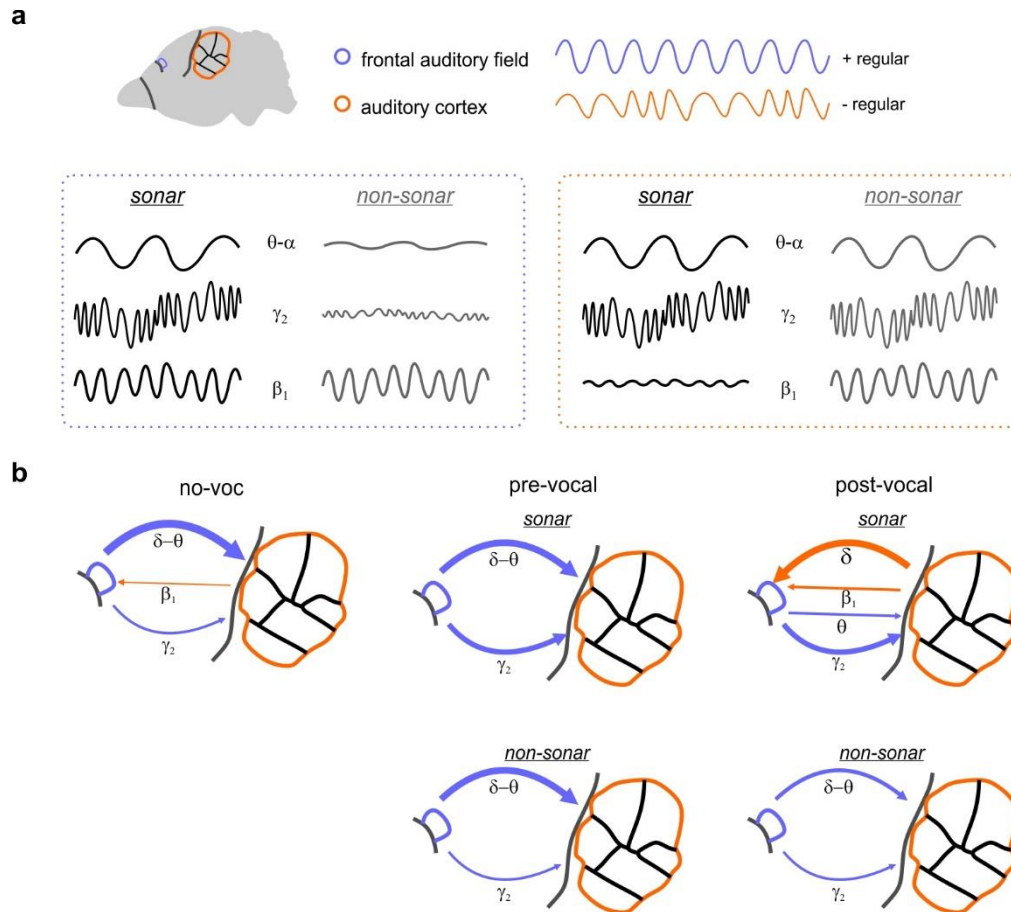

1173

1174 **Fig. 7. The FAF-AC network during vocal production.**

1175
